# Supplementary material
Source: publisher figshare collection journal article supplement (https://gsapubs.figshare.com/ndownloader/files/22233492)
Supplement: Supplementary file 1 [file 22233492]

## Sheet: All_Turritella_Isotope_Data_rev
Table S2 – Raw δ18O and δ13C data for all shells
ShellNum	SampNum	AccDist	d13C	d18O	Species	Age	Type	Location
290819-1	290819-1 1	137.41	2.37	-0.85	larensis	17.4	Fossil	Colombia
290819-1	290819-1 2	132.41	2.42	-1.22	larensis	17.4	Fossil	Colombia
290819-1	290819-1 3	127.41	2.78	-1.25	larensis	17.4	Fossil	Colombia
290819-1	290819-1 4	120.71	3.05	-1.41	larensis	17.4	Fossil	Colombia
290819-1	290819-1 5	114.01	2.86	-1.47	larensis	17.4	Fossil	Colombia
290819-1	290819-1 6	107.31	2.81	-1.34	larensis	17.4	Fossil	Colombia
290819-1	290819-1 7	102.86	2.9	-1.35	larensis	17.4	Fossil	Colombia
290819-1	290819-1 8	98.41	3	-1.34	larensis	17.4	Fossil	Colombia
290819-1	290819-1 9	95.03	3.08	-1.31	larensis	17.4	Fossil	Colombia
290819-1	290819-1 10	91.65	3.1	-1.42	larensis	17.4	Fossil	Colombia
290819-1	290819-1 11	87.43	3.09	-1.25	larensis	17.4	Fossil	Colombia
290819-1	290819-1 12	83.13	3.19	-1.35	larensis	17.4	Fossil	Colombia
290819-1	290819-1 13	79.63	3.06	-1.6	larensis	17.4	Fossil	Colombia
290819-1	290819-1 14	76.13	2.97	-1.45	larensis	17.4	Fossil	Colombia
290819-1	290819-1 15	71.43	3.1	-1.4	larensis	17.4	Fossil	Colombia
290819-1	290819-1 16	67.83	3.02	-1.39	larensis	17.4	Fossil	Colombia
290819-1	290819-1 17	63.53	3.02	-1.37	larensis	17.4	Fossil	Colombia
290819-1	290819-1 18	59.53	3.16	-1.25	larensis	17.4	Fossil	Colombia
290819-1	290819-1 19	56.03	3.08	-1.28	larensis	17.4	Fossil	Colombia
290819-1	290819-1 20	53.57	3.02	-1.21	larensis	17.4	Fossil	Colombia
290819-1	290819-1 21	51.11	2.96	-1.3	larensis	17.4	Fossil	Colombia
290819-1	290819-1 22	47.18	2.93	-1.25	larensis	17.4	Fossil	Colombia
290819-1	290819-1 23	43.26	2.93	-1.15	larensis	17.4	Fossil	Colombia
290819-1	290819-1 24	39.07	2.9	-1.17	larensis	17.4	Fossil	Colombia
290819-1	290819-1 25	35.49	2.92	-1.07	larensis	17.4	Fossil	Colombia
290819-1	290819-1 26	32.53	2.92	-1.01	larensis	17.4	Fossil	Colombia
290819-1	290819-1 27	26.17	2.78	-1	larensis	17.4	Fossil	Colombia
290819-1	290819-1 28	21.95	2.9	-1.26	larensis	17.4	Fossil	Colombia
290819-1	290819-1 29	18.43	2.75	-1.23	larensis	17.4	Fossil	Colombia
290819-1	290819-1 30	14.9	2.49	-1.61	larensis	17.4	Fossil	Colombia
290819-2	290819-2 1	150.62	2.26	-0.47	larensis	17.4	Fossil	Colombia
290819-2	290819-2 2	147.12	2.37	-0.27	larensis	17.4	Fossil	Colombia
290819-2	290819-2 3	143.62	2.8	-0.64	larensis	17.4	Fossil	Colombia
290819-2	290819-2 4	141.46	2.6	-1.81	larensis	17.4	Fossil	Colombia
290819-2	290819-2 5	139	2.81	-1.77	larensis	17.4	Fossil	Colombia
290819-2	290819-2 6	134.17	2.98	-1.94	larensis	17.4	Fossil	Colombia
290819-2	290819-2 7	130.08	3.25	-2	larensis	17.4	Fossil	Colombia
290819-2	290819-2 8	125.99	3.25	-1.92	larensis	17.4	Fossil	Colombia
290819-2	290819-2 9	120.65	3.2	-2.03	larensis	17.4	Fossil	Colombia
290819-2	290819-2 10	117.06	NA	NA	larensis	17.4	Fossil	Colombia
290819-2	290819-2 11	112.38	3.3	-1.9	larensis	17.4	Fossil	Colombia
290819-2	290819-2 12	110.09	3.01	-1.76	larensis	17.4	Fossil	Colombia
290819-2	290819-2 13	106.62	3.34	-1.72	larensis	17.4	Fossil	Colombia
290819-2	290819-2 14	103.15	3.27	-1.7	larensis	17.4	Fossil	Colombia
290819-2	290819-2 15	98.35	3.13	-1.42	larensis	17.4	Fossil	Colombia
290819-2	290819-2 16	93.55	3.07	-1.46	larensis	17.4	Fossil	Colombia
290819-2	290819-2 17	89.55	3.03	-1.13	larensis	17.4	Fossil	Colombia
290819-2	290819-2 18	85.21	3.01	-1.06	larensis	17.4	Fossil	Colombia
290819-2	290819-2 19	82.16	3.03	-1.12	larensis	17.4	Fossil	Colombia
290819-2	290819-2 20	78.43	2.97	-0.98	larensis	17.4	Fossil	Colombia
290819-2	290819-2 21	74.7	2.77	-0.89	larensis	17.4	Fossil	Colombia
290819-2	290819-2 22	71.2	2.86	-0.97	larensis	17.4	Fossil	Colombia
290819-2	290819-2 23	69.23	2.85	-0.79	larensis	17.4	Fossil	Colombia
290819-2	290819-2 24	65.91	2.91	-0.92	larensis	17.4	Fossil	Colombia
290819-2	290819-2 25	62.17	2.64	-0.51	larensis	17.4	Fossil	Colombia
290819-2	290819-2 26	55.84	2.51	-0.26	larensis	17.4	Fossil	Colombia
290819-2	290819-2 27	53	2.61	-0.3	larensis	17.4	Fossil	Colombia
290819-2	290819-2 28	48.92	2.72	-0.2	larensis	17.4	Fossil	Colombia
290819-2	290819-2 29	44.12	2.57	-0.19	larensis	17.4	Fossil	Colombia
290819-2	290819-2 30	39.32	2.61	-0.25	larensis	17.4	Fossil	Colombia
290819-2	290819-2 31	33.14	2.66	-0.46	larensis	17.4	Fossil	Colombia
290819-2	290819-2 32	28.5	NA	NA	larensis	17.4	Fossil	Colombia
290819-2	290819-2 33	25	2.61	-0.61	larensis	17.4	Fossil	Colombia
290819-2	290819-2 34	19.8	2.85	-1.5	larensis	17.4	Fossil	Colombia
290819-2	290819-2 35	16.6	3.03	-1.6	larensis	17.4	Fossil	Colombia
290819-2	290819-2 36	14.1	2.79	-1.68	larensis	17.4	Fossil	Colombia
290819-2	290819-2 37	11	2.65	-1.39	larensis	17.4	Fossil	Colombia
290821-1	290821-1	117.97	1.5505	-2.65663	matarucana	17.4	Fossil	Colombia
290821-1	290821-2	113.06	1.9045	-2.70463	matarucana	17.4	Fossil	Colombia
290821-1	290821-3	107.94	1.9165	-2.63563	matarucana	17.4	Fossil	Colombia
290821-1	290821-4	103.6	2.2035	-2.63662	matarucana	17.4	Fossil	Colombia
290821-1	290821-5	99.25	2.3115	-2.63262	matarucana	17.4	Fossil	Colombia
290821-1	290821-6	95.91	2.6655	-2.65462	matarucana	17.4	Fossil	Colombia
290821-1	290821-7	90.98	2.2615	-2.63863	matarucana	17.4	Fossil	Colombia
290821-1	290821-8	85.01	2.5875	-2.60562	matarucana	17.4	Fossil	Colombia
290821-1	290821-9	80.22	2.5175	-2.62363	matarucana	17.4	Fossil	Colombia
290821-1	290821-10	75.43	2.5835	-2.65663	matarucana	17.4	Fossil	Colombia
290821-1	290821-11	70.64	2.4595	-2.55762	matarucana	17.4	Fossil	Colombia
290821-1	290821-12	65.85	2.6765	-2.58763	matarucana	17.4	Fossil	Colombia
290821-1	290821-13	61.06	2.8225	-2.58263	matarucana	17.4	Fossil	Colombia
290821-1	290821-14	55.49	2.7745	-2.50462	matarucana	17.4	Fossil	Colombia
290821-1	290821-15	52.05	2.4835	-2.60062	matarucana	17.4	Fossil	Colombia
290821-1	290821-16	47.64	2.2545	-2.50362	matarucana	17.4	Fossil	Colombia
290821-1	290821-17	43.23	2.8705	-2.54862	matarucana	17.4	Fossil	Colombia
290821-1	290821-18	39.78	3.0855	-2.51963	matarucana	17.4	Fossil	Colombia
290821-1	290821-19	36.94	3.0315	-2.54062	matarucana	17.4	Fossil	Colombia
290821-1	290821-20	33.39	3.1425	-2.52663	matarucana	17.4	Fossil	Colombia
290821-1	290821-21	30.91	3.0845	-2.50762	matarucana	17.4	Fossil	Colombia
290821-1	290821-22	25.63	2.9335	-2.55963	matarucana	17.4	Fossil	Colombia
290821-1	290821-23	21.14	2.9245	-2.40963	matarucana	17.4	Fossil	Colombia
290821-1	290821-24	16.1	2.9155	-2.45063	matarucana	17.4	Fossil	Colombia
290821-1	290821-25	13.05	2.8225	-2.43662	matarucana	17.4	Fossil	Colombia
290821-1	290821-26	10	2.5535	-2.40062	matarucana	17.4	Fossil	Colombia
290808-1	290808-1 1	141.86	3.18	-1.91	larensis	17	Fossil	Colombia
290808-1	290808-1 2	138.61	2.99	-1.93	larensis	17	Fossil	Colombia
290808-1	290808-1 3	135.36	2.98	-1.97	larensis	17	Fossil	Colombia
290808-1	290808-1 4	132.11	3.32	-1.94	larensis	17	Fossil	Colombia
290808-1	290808-1 5	128.86	3.32	-2	larensis	17	Fossil	Colombia
290808-1	290808-1 6	125.61	NA	NA	larensis	17	Fossil	Colombia
290808-1	290808-1 7	122.36	3.41	-1.96	larensis	17	Fossil	Colombia
290808-1	290808-1 8	117.56	3.48	-1.97	larensis	17	Fossil	Colombia
290808-1	290808-1 9	112.76	3.69	-2.01	larensis	17	Fossil	Colombia
290808-1	290808-1 10	107.96	3.5	-2.06	larensis	17	Fossil	Colombia
290808-1	290808-1 11	103.86	3.47	-1.96	larensis	17	Fossil	Colombia
290808-1	290808-1 12	99.06	3.34	-2.08	larensis	17	Fossil	Colombia
290808-1	290808-1 13	94.26	3.74	-1.97	larensis	17	Fossil	Colombia
290808-1	290808-1 14	89.46	3.71	-2.08	larensis	17	Fossil	Colombia
290808-1	290808-1 15	84.66	3.5	-2.01	larensis	17	Fossil	Colombia
290808-1	290808-1 16	79.86	3.64	-1.93	larensis	17	Fossil	Colombia
290808-1	290808-1 17	75.06	3.82	-1.72	larensis	17	Fossil	Colombia
290808-1	290808-1 18	70.26	3.61	-1.69	larensis	17	Fossil	Colombia
290808-1	290808-1 19	65.46	3.62	-1.62	larensis	17	Fossil	Colombia
290808-1	290808-1 20	60.66	3.49	-1.71	larensis	17	Fossil	Colombia
290808-1	290808-1 21	54.76	3.25	-1.4	larensis	17	Fossil	Colombia
290808-1	290808-1 22	50.76	3.29	-1.63	larensis	17	Fossil	Colombia
290808-1	290808-1 23	46.56	3.27	-1.62	larensis	17	Fossil	Colombia
290808-1	290808-1 24	42.36	3.12	-1.65	larensis	17	Fossil	Colombia
290808-1	290808-1 25	38.16	3.13	-1.74	larensis	17	Fossil	Colombia
290808-1	290808-1 26	34.86	3.05	-1.82	larensis	17	Fossil	Colombia
290808-1	290808-1 27	31.56	3.12	-1.8	larensis	17	Fossil	Colombia
290808-1	290808-1 28	26.96	2.86	-1.87	larensis	17	Fossil	Colombia
290808-1	290808-1 29	23.47	2.86	-1.83	larensis	17	Fossil	Colombia
290808-1	290808-1 30	19.98	3.08	-2.23	larensis	17	Fossil	Colombia
290808-1	290808-1 31	16.49	3.07	-2.19	larensis	17	Fossil	Colombia
290808-1	290808-1 32	13	2.9	-2.25	larensis	17	Fossil	Colombia
290602-1	290602-1 1	198.64	2.05	-2.4	matarucana	17	Fossil	Colombia
290602-1	290602-1 2	191.14	1.97	-2.44	matarucana	17	Fossil	Colombia
290602-1	290602-1 3	185.54	1.98	-2.31	matarucana	17	Fossil	Colombia
290602-1	290602-1 4	178.13	2.32	-2.36	matarucana	17	Fossil	Colombia
290602-1	290602-1 5	171.23	2.27	-2.52	matarucana	17	Fossil	Colombia
290602-1	290602-1 6	163.41	1.91	-2.46	matarucana	17	Fossil	Colombia
290602-1	290602-1 7	157.03	2.42	-2.46	matarucana	17	Fossil	Colombia
290602-1	290602-1 8	150.75	2.59	-2.4	matarucana	17	Fossil	Colombia
290602-1	290602-1 9	145.75	2.79	-2.38	matarucana	17	Fossil	Colombia
290602-1	290602-1 10	140.74	2.89	-2.34	matarucana	17	Fossil	Colombia
290602-1	290602-1 11	133.43	2.37	-2.13	matarucana	17	Fossil	Colombia
290602-1	290602-1 12	129.54	2.54	-2.23	matarucana	17	Fossil	Colombia
290602-1	290602-1 13	122.89	2.57	-2.31	matarucana	17	Fossil	Colombia
290602-1	290602-1 14	118.83	3.04	-2.22	matarucana	17	Fossil	Colombia
290602-1	290602-1 15	114.02	3.33	-2.24	matarucana	17	Fossil	Colombia
290602-1	290602-1 16	109.22	3.01	-2.29	matarucana	17	Fossil	Colombia
290602-1	290602-1 17	104.42	3.01	-2.21	matarucana	17	Fossil	Colombia
290602-1	290602-1 18	99.62	2.76	-2.27	matarucana	17	Fossil	Colombia
290602-1	290602-1 19	93.22	2.65	-2.25	matarucana	17	Fossil	Colombia
290602-1	290602-1 20	87.72	2.51	-2.09	matarucana	17	Fossil	Colombia
290602-1	290602-1 21	83.76	3.05	-2.15	matarucana	17	Fossil	Colombia
290602-1	290602-1 22	79.82	2.84	-2.03	matarucana	17	Fossil	Colombia
290602-1	290602-1 23	75.31	2.67	-1.97	matarucana	17	Fossil	Colombia
290602-1	290602-1 24	68.34	2.82	-1.64	matarucana	17	Fossil	Colombia
290602-1	290602-1 25	63.38	2.94	-1.48	matarucana	17	Fossil	Colombia
290602-1	290602-1 26	59.55	3.01	-1.42	matarucana	17	Fossil	Colombia
290602-1	290602-1 27	54.03	3.32	-1.43	matarucana	17	Fossil	Colombia
290602-1	290602-1 28	48.65	3.18	-1.19	matarucana	17	Fossil	Colombia
290602-1	290602-1 29	43.92	2.97	-1.08	matarucana	17	Fossil	Colombia
290602-1	290602-1 30	38.66	2.93	-1.05	matarucana	17	Fossil	Colombia
290602-1	290602-1 31	35.65	2.84	-0.94	matarucana	17	Fossil	Colombia
290602-1	290602-1 32	32.54	3.11	-0.87	matarucana	17	Fossil	Colombia
290602-1	290602-1 33	29.43	2.85	-0.59	matarucana	17	Fossil	Colombia
290602-1	290602-1 34	25.11	2.86	-0.7	matarucana	17	Fossil	Colombia
290602-1	290602-1 35	19.1	2.93	-0.81	matarucana	17	Fossil	Colombia
290602-1	290602-1 36	16	2.6	-0.95	matarucana	17	Fossil	Colombia
290602-2	290602-2 1	167.12	3.01	-1.93	montanitensis	17	Fossil	Colombia
290602-2	290602-2 2	162.76	3	-1.95	montanitensis	17	Fossil	Colombia
290602-2	290602-2 3	158.4	3.15	-2	montanitensis	17	Fossil	Colombia
290602-2	290602-2 4	154.04	2.86	-2.1	montanitensis	17	Fossil	Colombia
290602-2	290602-2 5	149.68	2.85	-2.09	montanitensis	17	Fossil	Colombia
290602-2	290602-2 6	145.03	2.46	-2.28	montanitensis	17	Fossil	Colombia
290602-2	290602-2 7	140.38	2.58	-2.2	montanitensis	17	Fossil	Colombia
290602-2	290602-2 8	134.54	2.73	-2.17	montanitensis	17	Fossil	Colombia
290602-2	290602-2 9	128.42	2.92	-2.13	montanitensis	17	Fossil	Colombia
290602-2	290602-2 10	124.09	2.81	-2.21	montanitensis	17	Fossil	Colombia
290602-2	290602-2 11	121.22	2.98	-2.21	montanitensis	17	Fossil	Colombia
290602-2	290602-2 12	115.77	2.63	-2.15	montanitensis	17	Fossil	Colombia
290602-2	290602-2 13	111.57	2.93	-2.13	montanitensis	17	Fossil	Colombia
290602-2	290602-2 14	106.33	2.98	-2.16	montanitensis	17	Fossil	Colombia
290602-2	290602-2 15	98.99	2.99	-1.61	montanitensis	17	Fossil	Colombia
290602-2	290602-2 16	93.22	3.02	-1.65	montanitensis	17	Fossil	Colombia
290602-2	290602-2 17	87.45	3.02	-1.3	montanitensis	17	Fossil	Colombia
290602-2	290602-2 18	81.68	3.07	-1.13	montanitensis	17	Fossil	Colombia
290602-2	290602-2 19	76.38	3.12	-1.17	montanitensis	17	Fossil	Colombia
290602-2	290602-2 20	71.56	2.92	-1.15	montanitensis	17	Fossil	Colombia
290602-2	290602-2 21	68.58	2.94	-1.02	montanitensis	17	Fossil	Colombia
290602-2	290602-2 22	64.99	3.01	-0.94	montanitensis	17	Fossil	Colombia
290602-2	290602-2 23	61.4	3.17	-0.9	montanitensis	17	Fossil	Colombia
290602-2	290602-2 24	57.81	3.07	-0.8	montanitensis	17	Fossil	Colombia
290602-2	290602-2 25	54.22	3.1	-0.88	montanitensis	17	Fossil	Colombia
290602-2	290602-2 26	49.88	NA	NA	montanitensis	17	Fossil	Colombia
290602-2	290602-2 27	45.54	3.07	-1.09	montanitensis	17	Fossil	Colombia
290602-2	290602-2 28	41.2	3.41	-1.08	montanitensis	17	Fossil	Colombia
290602-2	290602-2 29	34.74	3.15	-0.92	montanitensis	17	Fossil	Colombia
290602-2	290602-2 30	30.92	2.99	-0.96	montanitensis	17	Fossil	Colombia
290602-2	290602-2 31	27.09	3.05	-1.02	montanitensis	17	Fossil	Colombia
290602-2	290602-2 32	23.27	2.92	-0.87	montanitensis	17	Fossil	Colombia
290602-2	290602-2 33	19.44	3.23	-0.77	montanitensis	17	Fossil	Colombia
290602-2	290602-2 34	15.61	3.32	-0.44	montanitensis	17	Fossil	Colombia
290602-2	290602-2 35	13	3.08	-0.51	montanitensis	17	Fossil	Colombia
290602-A	602A-1	190	3.12533	-1.27094	matarucana	17	Fossil	Colombia
290602-A	602A-1.5	166	3.48376	-2.10752	matarucana	17	Fossil	Colombia
290602-A	602A-2	141	3.45991	-2.52218	matarucana	17	Fossil	Colombia
290602-A	602A-2.5	119	3.37546	-2.31737	matarucana	17	Fossil	Colombia
290602-A	602A-3	102	3.07778	-2.14237	matarucana	17	Fossil	Colombia
290602-A	602A-3.5	84	3.20158	-2.57767	matarucana	17	Fossil	Colombia
290602-A	602A-4	65	3.47895	-2.42315	matarucana	17	Fossil	Colombia
290602-A	602A-5	40	3.45419	-1.60587	matarucana	17	Fossil	Colombia
290808-A	808A - 1	205	3.37098	-2.13735	larensis	17	Fossil	Colombia
290808-A	808A-1.3	191	3.21351	-2.35672	larensis	17	Fossil	Colombia
290808-A	808A-1.7	172	3.29398	-2.14787	larensis	17	Fossil	Colombia
290808-A	808A - 2	160	2.72515	-3.13915	larensis	17	Fossil	Colombia
290808-A	808A-2.3	146	3.51953	-2.28509	larensis	17	Fossil	Colombia
290808-A	808A-2.7	132	3.58212	-2.12467	larensis	17	Fossil	Colombia
290808-A	808A - 3	123	3.52551	-1.87863	larensis	17	Fossil	Colombia
290808-A	808A - 4	89	3.13424	-1.77835	larensis	17	Fossil	Colombia
290808-A	808A - 5	59	3.21349	-1.96287	larensis	17	Fossil	Colombia
290808-A	808A - 6	36	3.1491	-1.94783	larensis	17	Fossil	Colombia
290808-A	808A - 7	19	2.94802	-2.07217	larensis	17	Fossil	Colombia
290847-A	847A - 1	260	2.83014	-2.4061	machapoorensis	16.1	Fossil	Colombia
290847-A	847A - 2	206	2.87274	-2.88343	machapoorensis	16.1	Fossil	Colombia
290847-A	847A - 3	161	3.50372	-3.19631	machapoorensis	16.1	Fossil	Colombia
290847-A	847A - 4	121	3.36801	-3.13113	machapoorensis	16.1	Fossil	Colombia
290847-A	847A - 5	86	3.30363	-3.27553	machapoorensis	16.1	Fossil	Colombia
290847-A	847A - 6	57	2.68552	-1.37322	machapoorensis	16.1	Fossil	Colombia
290847-A	847A - 7	34	2.54289	-2.09825	machapoorensis	16.1	Fossil	Colombia
290841-1	290841-1	164.09	1.89	-1.74	matarucana	15.9	Fossil	Colombia
290841-1	290841-2	160.63	2.47	-1.83	matarucana	15.9	Fossil	Colombia
290841-1	290841-3	156.43	2.63	-1.86	matarucana	15.9	Fossil	Colombia
290841-1	290841-4	152.23	2.34	-1.85	matarucana	15.9	Fossil	Colombia
290841-1	290841-5	148.03	2.83	-1.74	matarucana	15.9	Fossil	Colombia
290841-1	290841-6	143.23	1.78	-1.77	matarucana	15.9	Fossil	Colombia
290841-1	290841-7	137.38	1.81	-1.66	matarucana	15.9	Fossil	Colombia
290841-1	290841-8	132.96	1.76	-1.68	matarucana	15.9	Fossil	Colombia
290841-1	290841-9	127.73	2.5	-1.62	matarucana	15.9	Fossil	Colombia
290841-1	290841-10	123.23	1.35	-1.71	matarucana	15.9	Fossil	Colombia
290841-1	290841-11	118.73	1.44	-1.76	matarucana	15.9	Fossil	Colombia
290841-1	290841-12	114.23	1.67	-1.67	matarucana	15.9	Fossil	Colombia
290841-1	290841-13	108.83	1.3	-1.7	matarucana	15.9	Fossil	Colombia
290841-1	290841-14	105.43	1.8	-1.76	matarucana	15.9	Fossil	Colombia
290841-1	290841-15	102.63	1.8	-1.79	matarucana	15.9	Fossil	Colombia
290841-1	290841-16	98.83	1.13	-1.94	matarucana	15.9	Fossil	Colombia
290841-1	290841-17	96.03	1.37	-2.12	matarucana	15.9	Fossil	Colombia
290841-1	290841-18	93.03	1.39	-2.04	matarucana	15.9	Fossil	Colombia
290841-1	290841-19	90.03	1.54	-2.05	matarucana	15.9	Fossil	Colombia
290841-1	290841-20	86.33	1.77	-2.2	matarucana	15.9	Fossil	Colombia
290841-1	290841-21	82.63	1.12	-2.36	matarucana	15.9	Fossil	Colombia
290841-1	290841-22	80.08	-0.88	-2.64	matarucana	15.9	Fossil	Colombia
290841-1	290841-23	74.58	-1.53	-2.58	matarucana	15.9	Fossil	Colombia
290841-1	290841-24	70.18	-1.79	-2.52	matarucana	15.9	Fossil	Colombia
290841-1	290841-25	65.78	-1.56	-2.52	matarucana	15.9	Fossil	Colombia
290841-1	290841-26	61.38	NA	NA	matarucana	15.9	Fossil	Colombia
290841-1	290841-27	56.5	0.22	-2.37	matarucana	15.9	Fossil	Colombia
290841-1	290841-28	52.9	0.75	-2.44	matarucana	15.9	Fossil	Colombia
290841-1	290841-29	47.25	1.05	-2.38	matarucana	15.9	Fossil	Colombia
290841-1	290841-30	43	1.39	-2.43	matarucana	15.9	Fossil	Colombia
290841-1	290841-31	38.74	1.63	-2.4	matarucana	15.9	Fossil	Colombia
290841-1	290841-32	34.48	1.77	-2.38	matarucana	15.9	Fossil	Colombia
290841-1	290841-33	27.78	1.75	-2.37	matarucana	15.9	Fossil	Colombia
290841-1	290841-34	23.53	2.22	-2.21	matarucana	15.9	Fossil	Colombia
290841-1	290841-35	18.5	2.31	-2.19	matarucana	15.9	Fossil	Colombia
290841-1	290841-36	15.5	2.5	-2.31	matarucana	15.9	Fossil	Colombia
290841-1	290841-37	12	2.58	-2.34	matarucana	15.9	Fossil	Colombia
290841-1	290841-38	9	2.61	-2.28	matarucana	15.9	Fossil	Colombia
290841-2	290841-2 1	186.48	1.62	-1.74	matarucana	15.9	Fossil	Colombia
290841-2	290841-2 2	182.81	1.97	-1.64	matarucana	15.9	Fossil	Colombia
290841-2	290841-2 3	176.9	1.98	-1.62	matarucana	15.9	Fossil	Colombia
290841-2	290841-2 4	173.36	1.73	-1.73	matarucana	15.9	Fossil	Colombia
290841-2	290841-2 5	170.28	2.07	-1.67	matarucana	15.9	Fossil	Colombia
290841-2	290841-2 6	166.5	1.79	-1.75	matarucana	15.9	Fossil	Colombia
290841-2	290841-2 7	160.76	1.62	-1.55	matarucana	15.9	Fossil	Colombia
290841-2	290841-2 8	157.11	1.73	-1.63	matarucana	15.9	Fossil	Colombia
290841-2	290841-2 9	153.47	2.14	-1.63	matarucana	15.9	Fossil	Colombia
290841-2	290841-2 10	149.83	2.04	-1.69	matarucana	15.9	Fossil	Colombia
290841-2	290841-2 11	146.19	2.13	-1.71	matarucana	15.9	Fossil	Colombia
290841-2	290841-2 12	142.55	2.08	-1.69	matarucana	15.9	Fossil	Colombia
290841-2	290841-2 13	139.98	2.72	-1.6	matarucana	15.9	Fossil	Colombia
290841-2	290841-2 14	135.67	2.73	-1.51	matarucana	15.9	Fossil	Colombia
290841-2	290841-2 15	132.19	2.4	-1.48	matarucana	15.9	Fossil	Colombia
290841-2	290841-2 16	126.94	1.13	-1.86	matarucana	15.9	Fossil	Colombia
290841-2	290841-2 17	123.11	0.98	-2.21	matarucana	15.9	Fossil	Colombia
290841-2	290841-2 18	116.24	0.69	-2.08	matarucana	15.9	Fossil	Colombia
290841-2	290841-2 19	113.07	0.43	-2.41	matarucana	15.9	Fossil	Colombia
290841-2	290841-2 20	109.89	0.54	-2.36	matarucana	15.9	Fossil	Colombia
290841-2	290841-2 21	104.67	0.57	-2.44	matarucana	15.9	Fossil	Colombia
290841-2	290841-2 22	99.45	0.45	-2.49	matarucana	15.9	Fossil	Colombia
290841-2	290841-2 23	94.23	0.32	-2.52	matarucana	15.9	Fossil	Colombia
290841-2	290841-2 24	90.94	0.23	-2.63	matarucana	15.9	Fossil	Colombia
290841-2	290841-2 25	87.53	0.2	-2.56	matarucana	15.9	Fossil	Colombia
290841-2	290841-2 26	84.12	0.48	-2.49	matarucana	15.9	Fossil	Colombia
290841-2	290841-2 27	80.71	0.74	-2.61	matarucana	15.9	Fossil	Colombia
290841-2	290841-2 28	77.3	0.83	-2.48	matarucana	15.9	Fossil	Colombia
290841-2	290841-2 29	71.1	0.99	-2.49	matarucana	15.9	Fossil	Colombia
290841-2	290841-2 30	64.9	1.01	-2.44	matarucana	15.9	Fossil	Colombia
290841-2	290841-2 31	60.35	1.32	-2.43	matarucana	15.9	Fossil	Colombia
290841-2	290841-2 32	57.42	1.57	-2.45	matarucana	15.9	Fossil	Colombia
290841-2	290841-2 33	54	1.3	-2.49	matarucana	15.9	Fossil	Colombia
290841-2	290841-2 34	50.6	0.56	-2.55	matarucana	15.9	Fossil	Colombia
290841-2	290841-2 35	47.2	0.5	-2.61	matarucana	15.9	Fossil	Colombia
290841-2	290841-2 36	43.8	0.43	-2.61	matarucana	15.9	Fossil	Colombia
290841-2	290841-2 37	40.4	0.22	-2.71	matarucana	15.9	Fossil	Colombia
290841-2	290841-2 38	36.2	0.14	-2.75	matarucana	15.9	Fossil	Colombia
290841-2	290841-2 39	32	0.58	-2.69	matarucana	15.9	Fossil	Colombia
290841-2	290841-2 40	30.5	0.56	-2.7	matarucana	15.9	Fossil	Colombia
290841-2	290841-2 41	29	0.39	-2.66	matarucana	15.9	Fossil	Colombia
290841-2	290841-2 42	27.5	-0.34	-2.65	matarucana	15.9	Fossil	Colombia
290841-2	290841-2 43	26	-0.38	-2.67	matarucana	15.9	Fossil	Colombia
290841-2	290841-2 44	24.5	-0.09	-2.68	matarucana	15.9	Fossil	Colombia
290841-2	290841-2 45	23	0.33	-2.56	matarucana	15.9	Fossil	Colombia
290841-2	290841-2 46	21.5	0.52	-2.6	matarucana	15.9	Fossil	Colombia
290841-2	290841-2 47	20	0.62	-2.55	matarucana	15.9	Fossil	Colombia
290841-2	290841-2 48	18.5	0.71	-2.55	matarucana	15.9	Fossil	Colombia
290841-2	290841-2 49	17	0.44	-2.6	matarucana	15.9	Fossil	Colombia
290841-3	290841-3 1	215.77	2.99	-2.23	falconensis	15.9	Fossil	Colombia
290841-3	290841-3 2	212.36	2.92	-2.05	falconensis	15.9	Fossil	Colombia
290841-3	290841-3 3	208.95	2.84	-1.95	falconensis	15.9	Fossil	Colombia
290841-3	290841-3 4	205.55	2.88	-1.91	falconensis	15.9	Fossil	Colombia
290841-3	290841-3 5	201.05	2.81	-1.77	falconensis	15.9	Fossil	Colombia
290841-3	290841-3 6	196.55	3.11	-1.82	falconensis	15.9	Fossil	Colombia
290841-3	290841-3 7	192.05	3.15	-1.79	falconensis	15.9	Fossil	Colombia
290841-3	290841-3 8	187.55	3.08	-1.9	falconensis	15.9	Fossil	Colombia
290841-3	290841-3 9	183.04	3.29	-1.82	falconensis	15.9	Fossil	Colombia
290841-3	290841-3 10	178.53	2.84	-1.64	falconensis	15.9	Fossil	Colombia
290841-3	290841-3 11	174.02	3.22	-1.7	falconensis	15.9	Fossil	Colombia
290841-3	290841-3 12	169.51	3.2	-1.62	falconensis	15.9	Fossil	Colombia
290841-3	290841-3 13	165	3.51	-1.45	falconensis	15.9	Fossil	Colombia
290841-3	290841-3 14	160.49	3.58	-1.29	falconensis	15.9	Fossil	Colombia
290841-3	290841-3 15	155.98	3.39	-1.07	falconensis	15.9	Fossil	Colombia
290841-3	290841-3 16	151.47	3.67	-1.28	falconensis	15.9	Fossil	Colombia
290841-3	290841-3 17	146.96	3.76	-1.36	falconensis	15.9	Fossil	Colombia
290841-3	290841-3 18	139.36	3.32	-1.18	falconensis	15.9	Fossil	Colombia
290841-3	290841-3 19	135.56	3.27	-1.07	falconensis	15.9	Fossil	Colombia
290841-3	290841-3 20	131.76	3.18	-1.16	falconensis	15.9	Fossil	Colombia
290841-3	290841-3 21	125.99	NA	NA	falconensis	15.9	Fossil	Colombia
290841-3	290841-3 22	121.83	3.19	-1.16	falconensis	15.9	Fossil	Colombia
290841-3	290841-3 23	117.67	3.12	-1.09	falconensis	15.9	Fossil	Colombia
290841-3	290841-3 24	113.51	2.93	-1.08	falconensis	15.9	Fossil	Colombia
290841-3	290841-3 25	109.35	3.07	-0.93	falconensis	15.9	Fossil	Colombia
290841-3	290841-3 26	105.19	3.09	-0.97	falconensis	15.9	Fossil	Colombia
290841-3	290841-3 27	99.56	3.19	-0.8	falconensis	15.9	Fossil	Colombia
290841-3	290841-3 28	95.52	2.94	-0.82	falconensis	15.9	Fossil	Colombia
290841-3	290841-3 29	91.48	2.7	-0.55	falconensis	15.9	Fossil	Colombia
290841-3	290841-3 30	87.44	2.91	-0.55	falconensis	15.9	Fossil	Colombia
290841-3	290841-3 31	84.14	3.02	-0.6	falconensis	15.9	Fossil	Colombia
290841-3	290841-3 32	80.84	3.01	-0.6	falconensis	15.9	Fossil	Colombia
290841-3	290841-3 33	77.54	2.89	-0.65	falconensis	15.9	Fossil	Colombia
290841-3	290841-3 34	74.24	2.88	-0.77	falconensis	15.9	Fossil	Colombia
290841-3	290841-3 35	70.94	2.73	-0.99	falconensis	15.9	Fossil	Colombia
290841-3	290841-3 36	67.64	2.83	-0.94	falconensis	15.9	Fossil	Colombia
290841-3	290841-3 37	64.34	2.96	-0.8	falconensis	15.9	Fossil	Colombia
290841-3	290841-3 38	61.04	2.79	-1.09	falconensis	15.9	Fossil	Colombia
290841-3	290841-3 39	57.74	2.72	-1.1	falconensis	15.9	Fossil	Colombia
290841-3	290841-3 40	54.09	2.81	-1	falconensis	15.9	Fossil	Colombia
290841-3	290841-3 41	50.44	2.98	-1.03	falconensis	15.9	Fossil	Colombia
290841-3	290841-3 42	45.5	2.84	-1.25	falconensis	15.9	Fossil	Colombia
290841-3	290841-3 43	40.56	2.89	-1.17	falconensis	15.9	Fossil	Colombia
290841-3	290841-3 44	37.53	2.97	-1.02	falconensis	15.9	Fossil	Colombia
290841-3	290841-3 45	34.5	3.08	-1.06	falconensis	15.9	Fossil	Colombia
290841-3	290841-3 46	30.6	3.09	-1.05	falconensis	15.9	Fossil	Colombia
290841-3	290841-3 47	26.7	3.08	-0.9	falconensis	15.9	Fossil	Colombia
290841-3	290841-3 48	22.8	3.07	-1.01	falconensis	15.9	Fossil	Colombia
290841-3	290841-3 49	19	2.93	-0.99	falconensis	15.9	Fossil	Colombia
290841-3	290841-3 50	15.5	3	-1	falconensis	15.9	Fossil	Colombia
290841-3	290841-3 51	12	2.93	-1.01	falconensis	15.9	Fossil	Colombia
290841-4	290841-4 1	198.26	2.2	-2.94	larensis	15.9	Fossil	Colombia
290841-4	290841-4 2	194.59	2.15	-3.02	larensis	15.9	Fossil	Colombia
290841-4	290841-4 3	188.57	2.47	-3.04	larensis	15.9	Fossil	Colombia
290841-4	290841-4 4	182.99	2.58	-3.03	larensis	15.9	Fossil	Colombia
290841-4	290841-4 5	178.79	2.88	-2.98	larensis	15.9	Fossil	Colombia
290841-4	290841-4 6	174.59	3.05	-3.07	larensis	15.9	Fossil	Colombia
290841-4	290841-4 7	170.39	3	-3.03	larensis	15.9	Fossil	Colombia
290841-4	290841-4 8	166.19	2.92	-3.03	larensis	15.9	Fossil	Colombia
290841-4	290841-4 9	160.51	2.88	-2.93	larensis	15.9	Fossil	Colombia
290841-4	290841-4 10	156.7	2.86	-2.9	larensis	15.9	Fossil	Colombia
290841-4	290841-4 11	150.48	2.93	-2.84	larensis	15.9	Fossil	Colombia
290841-4	290841-4 12	144.26	2.94	-2.8	larensis	15.9	Fossil	Colombia
290841-4	290841-4 13	138.04	3.09	-2.8	larensis	15.9	Fossil	Colombia
290841-4	290841-4 14	132.87	3.1	-2.82	larensis	15.9	Fossil	Colombia
290841-4	290841-4 15	127.7	3.32	-2.82	larensis	15.9	Fossil	Colombia
290841-4	290841-4 16	121.6	2.85	-2.85	larensis	15.9	Fossil	Colombia
290841-4	290841-4 17	116.98	3.11	-2.75	larensis	15.9	Fossil	Colombia
290841-4	290841-4 18	112.36	2.88	-2.67	larensis	15.9	Fossil	Colombia
290841-4	290841-4 19	107.74	2.63	-2.64	larensis	15.9	Fossil	Colombia
290841-4	290841-4 20	103.12	2.69	-2.6	larensis	15.9	Fossil	Colombia
290841-4	290841-4 21	98.5	2.67	-2.53	larensis	15.9	Fossil	Colombia
290841-4	290841-4 22	95.11	2.71	-2.5	larensis	15.9	Fossil	Colombia
290841-4	290841-4 23	89.53	2.55	-2.36	larensis	15.9	Fossil	Colombia
290841-4	290841-4 24	84.97	2.74	-2.37	larensis	15.9	Fossil	Colombia
290841-4	290841-4 25	80.41	2.88	-2.38	larensis	15.9	Fossil	Colombia
290841-4	290841-4 26	75.85	2.72	-2.11	larensis	15.9	Fossil	Colombia
290841-4	290841-4 27	68.04	2.62	-1.77	larensis	15.9	Fossil	Colombia
290841-4	290841-4 28	63.75	2.74	-2.26	larensis	15.9	Fossil	Colombia
290841-4	290841-4 29	59.46	2.75	-2.15	larensis	15.9	Fossil	Colombia
290841-4	290841-4 30	55.17	2.64	-2.01	larensis	15.9	Fossil	Colombia
290841-4	290841-4 31	52.92	2.63	-1.89	larensis	15.9	Fossil	Colombia
290841-4	290841-4 32	44.81	2.54	-1.73	larensis	15.9	Fossil	Colombia
290841-4	290841-4 33	39.33	2.56	-1.64	larensis	15.9	Fossil	Colombia
290841-4	290841-4 34	31.22	NA	NA	larensis	15.9	Fossil	Colombia
290841-4	290841-4 35	27.49	2.74	-1.19	larensis	15.9	Fossil	Colombia
290841-4	290841-4 36	23.76	NA	NA	larensis	15.9	Fossil	Colombia
290841-4	290841-4 37	18.73	2.59	-1.36	larensis	15.9	Fossil	Colombia
290841-4	290841-4 38	15	2.36	-1.37	larensis	15.9	Fossil	Colombia
290841-A	841A-1	231	1.85743	-1.99596	matarucana	15.9	Fossil	Colombia
290841-A	841A-2	190	0.838862	-1.9249	matarucana	15.9	Fossil	Colombia
290841-A	841A-3	150	1.08777	-1.98192	matarucana	15.9	Fossil	Colombia
290841-A	841A-4	116	0.825278	-2.48532	matarucana	15.9	Fossil	Colombia
290841-A	841A-5	90	-0.841812	-2.47229	matarucana	15.9	Fossil	Colombia
290841-A	841A-6	63	1.0531	-2.29379	matarucana	15.9	Fossil	Colombia
290448-1	290448-1 1	178.67	3.13	-2.6	falconensis	15.7	Fossil	Colombia
290448-1	290448-1 2	174.71	3.24	-2.55	falconensis	15.7	Fossil	Colombia
290448-1	290448-1 3	169.21	3.28	-2.46	falconensis	15.7	Fossil	Colombia
290448-1	290448-1 4	163.71	3.11	-2.12	falconensis	15.7	Fossil	Colombia
290448-1	290448-1 5	158.21	3.57	-2.27	falconensis	15.7	Fossil	Colombia
290448-1	290448-1 6	152.71	3.46	-2	falconensis	15.7	Fossil	Colombia
290448-1	290448-1 7	147.21	3.59	-1.99	falconensis	15.7	Fossil	Colombia
290448-1	290448-1 8	141.71	3.15	-1.9	falconensis	15.7	Fossil	Colombia
290448-1	290448-1 9	134.31	3.41	-1.82	falconensis	15.7	Fossil	Colombia
290448-1	290448-1 10	129.11	3.52	-1.73	falconensis	15.7	Fossil	Colombia
290448-1	290448-1 11	123.91	3.41	-1.45	falconensis	15.7	Fossil	Colombia
290448-1	290448-1 12	118.71	3.43	-1.38	falconensis	15.7	Fossil	Colombia
290448-1	290448-1 13	113.51	3.24	-1.43	falconensis	15.7	Fossil	Colombia
290448-1	290448-1 14	108.31	3.48	-1.4	falconensis	15.7	Fossil	Colombia
290448-1	290448-1 15	103.11	3.05	-1.48	falconensis	15.7	Fossil	Colombia
290448-1	290448-1 16	97.91	3.04	-1.22	falconensis	15.7	Fossil	Colombia
290448-1	290448-1 17	92.71	3.42	-1.12	falconensis	15.7	Fossil	Colombia
290448-1	290448-1 18	88.51	2.95	-1.01	falconensis	15.7	Fossil	Colombia
290448-1	290448-1 19	84.31	3.03	-1.04	falconensis	15.7	Fossil	Colombia
290448-1	290448-1 20	80.11	2.8	-1.44	falconensis	15.7	Fossil	Colombia
290448-1	290448-1 21	75.91	3.04	-1.28	falconensis	15.7	Fossil	Colombia
290448-1	290448-1 22	70.61	3.08	-1.39	falconensis	15.7	Fossil	Colombia
290448-1	290448-1 23	65.59	NA	NA	falconensis	15.7	Fossil	Colombia
290448-1	290448-1 24	61.39	3.16	-1.63	falconensis	15.7	Fossil	Colombia
290448-1	290448-1 25	57.19	3.17	-1.41	falconensis	15.7	Fossil	Colombia
290448-1	290448-1 26	52.99	2.55	-1.19	falconensis	15.7	Fossil	Colombia
290448-1	290448-1 27	48.79	3.23	-1.25	falconensis	15.7	Fossil	Colombia
290448-1	290448-1 28	44.59	3.15	-1.3	falconensis	15.7	Fossil	Colombia
290448-1	290448-1 29	41.4	2.99	-1.02	falconensis	15.7	Fossil	Colombia
290448-1	290448-1 30	38.2	3.11	-1.09	falconensis	15.7	Fossil	Colombia
290448-1	290448-1 31	34.9	2.85	-0.61	falconensis	15.7	Fossil	Colombia
290448-1	290448-1 32	31.7	3.11	-0.69	falconensis	15.7	Fossil	Colombia
290448-1	290448-1 33	28.5	3.07	-0.69	falconensis	15.7	Fossil	Colombia
290448-1	290448-1 34	25.3	3.12	-0.69	falconensis	15.7	Fossil	Colombia
290448-1	290448-1 35	22.1	3.11	-0.68	falconensis	15.7	Fossil	Colombia
290448-1	290448-1 36	17.7	3.03	-0.66	falconensis	15.7	Fossil	Colombia
290448-1	290448-1 37	14.2	3.05	-0.85	falconensis	15.7	Fossil	Colombia
290448-1	290448-1 38	11	2.98	-0.81	falconensis	15.7	Fossil	Colombia
290448-2	290448-2 1	152	2.95	-1.72	falconensis	15.7	Fossil	Colombia
290448-2	290448-2 2	147.4	3.29	-1.66	falconensis	15.7	Fossil	Colombia
290448-2	290448-2 3	142.8	3.41	-2.1	falconensis	15.7	Fossil	Colombia
290448-2	290448-2 4	138.2	2.81	-2.6	falconensis	15.7	Fossil	Colombia
290448-2	290448-2 5	132.1	3.27	-2.51	falconensis	15.7	Fossil	Colombia
290448-2	290448-2 6	127.7	3.16	-2.48	falconensis	15.7	Fossil	Colombia
290448-2	290448-2 7	122.8	3.08	-2.49	falconensis	15.7	Fossil	Colombia
290448-2	290448-2 8	117.9	3.14	-2.46	falconensis	15.7	Fossil	Colombia
290448-2	290448-2 9	113	3.19	-2.27	falconensis	15.7	Fossil	Colombia
290448-2	290448-2 10	108.1	3.21	-2.27	falconensis	15.7	Fossil	Colombia
290448-2	290448-2 11	102.1	3.12	-2.45	falconensis	15.7	Fossil	Colombia
290448-2	290448-2 12	96.1	3.46	-2.46	falconensis	15.7	Fossil	Colombia
290448-2	290448-2 13	90.1	3.37	-2.51	falconensis	15.7	Fossil	Colombia
290448-2	290448-2 14	82.1	3.4	-2.02	falconensis	15.7	Fossil	Colombia
290448-2	290448-2 15	76.6	3.13	-1.75	falconensis	15.7	Fossil	Colombia
290448-2	290448-2 16	71.1	3.21	-1.78	falconensis	15.7	Fossil	Colombia
290448-2	290448-2 17	65.6			falconensis	15.7	Fossil	Colombia
290448-2	290448-2 18	60.1	3.44	-1.55	falconensis	15.7	Fossil	Colombia
290448-2	290448-2 19	54.6	3.67	-1.52	falconensis	15.7	Fossil	Colombia
290448-2	290448-2 20	49.1	3.59	-1.51	falconensis	15.7	Fossil	Colombia
290448-2	290448-2 21	43.6	3.52	-1.61	falconensis	15.7	Fossil	Colombia
290448-2	290448-2 22	40	3.59	-1.66	falconensis	15.7	Fossil	Colombia
290448-2	290448-2 23	36.4	3.59	-1.62	falconensis	15.7	Fossil	Colombia
290448-2	290448-2 24	32.8			falconensis	15.7	Fossil	Colombia
290448-2	290448-2 25	29.2	3.29	-1.49	falconensis	15.7	Fossil	Colombia
290448-2	290448-2 26	25.6	3.39	-1.38	falconensis	15.7	Fossil	Colombia
290448-2	290448-2 27	22.6	3.46	-1.48	falconensis	15.7	Fossil	Colombia
290448-2	290448-2 28	19	3.04	-1.47	falconensis	15.7	Fossil	Colombia
290448-2	290448-2 29	16	3.09	-1.35	falconensis	15.7	Fossil	Colombia
290448-2	290448-2 30	13	2.98	-1.65	falconensis	15.7	Fossil	Colombia
290448-2	290448-2 31	10	2.84	-1.5	falconensis	15.7	Fossil	Colombia
290448-2	290448-2 32	7	3.18	-1.47	falconensis	15.7	Fossil	Colombia
290448-2	290448-2 33	4	2.98	-1.98	falconensis	15.7	Fossil	Colombia
290665-1	290665-1 1	186.66	1.69	-1.86	curamichatensis	15.7	Fossil	Colombia
290665-1	290665-1 2	183.62	0.66	-1.92	curamichatensis	15.7	Fossil	Colombia
290665-1	290665-1 3	178.62	0.36	-1.91	curamichatensis	15.7	Fossil	Colombia
290665-1	290665-1 4	175.47	0.12	-2	curamichatensis	15.7	Fossil	Colombia
290665-1	290665-1 5	172.32	1.24	-2	curamichatensis	15.7	Fossil	Colombia
290665-1	290665-1 6	168.46	1.13	-2.02	curamichatensis	15.7	Fossil	Colombia
290665-1	290665-1 7	162.34	1.91	-2.07	curamichatensis	15.7	Fossil	Colombia
290665-1	290665-1 8	156.22	2.07	-1.99	curamichatensis	15.7	Fossil	Colombia
290665-1	290665-1 9	150.1	1.85	-1.74	curamichatensis	15.7	Fossil	Colombia
290665-1	290665-1 10	143.98	1.66	-1.88	curamichatensis	15.7	Fossil	Colombia
290665-1	290665-1 11	136.37	0.85	-1.9	curamichatensis	15.7	Fossil	Colombia
290665-1	290665-1 12	130.86	0.69	-2.08	curamichatensis	15.7	Fossil	Colombia
290665-1	290665-1 13	123.11	0.83	-2.24	curamichatensis	15.7	Fossil	Colombia
290665-1	290665-1 14	116.64	1.03	-2.45	curamichatensis	15.7	Fossil	Colombia
290665-1	290665-1 15	111.46	1.19	-2.42	curamichatensis	15.7	Fossil	Colombia
290665-1	290665-1 16	106.28	1.81	-2.3	curamichatensis	15.7	Fossil	Colombia
290665-1	290665-1 17	102.36	2.12	-1.9	curamichatensis	15.7	Fossil	Colombia
290665-1	290665-1 18	99.52	2.3	-1.84	curamichatensis	15.7	Fossil	Colombia
290665-1	290665-1 19	94.67	2.65	-1.75	curamichatensis	15.7	Fossil	Colombia
290665-1	290665-1 20	91.17	2.37	-1.81	curamichatensis	15.7	Fossil	Colombia
290665-1	290665-1 21	86.31	2.32	-1.82	curamichatensis	15.7	Fossil	Colombia
290665-1	290665-1 22	82.72	2.49	-1.9	curamichatensis	15.7	Fossil	Colombia
290665-1	290665-1 23	76.46	2.08	-1.67	curamichatensis	15.7	Fossil	Colombia
290665-1	290665-1 24	70.2	2.68	-1.69	curamichatensis	15.7	Fossil	Colombia
290665-1	290665-1 25	63.94	2.4	-1.67	curamichatensis	15.7	Fossil	Colombia
290665-1	290665-1 26	59.39	2.88	-1.63	curamichatensis	15.7	Fossil	Colombia
290665-1	290665-1 27	54.19	2.86	-1.58	curamichatensis	15.7	Fossil	Colombia
290665-1	290665-1 28	48.13	2.36	-1.72	curamichatensis	15.7	Fossil	Colombia
290665-1	290665-1 29	42.87	2.26	-1.69	curamichatensis	15.7	Fossil	Colombia
290665-1	290665-1 30	38.55	2.82	-1.7	curamichatensis	15.7	Fossil	Colombia
290665-1	290665-1 31	33.11	2.97	-1.68	curamichatensis	15.7	Fossil	Colombia
290665-1	290665-1 32	27.67	2.26	-1.81	curamichatensis	15.7	Fossil	Colombia
290665-1	290665-1 33	23.62	2.3	-1.83	curamichatensis	15.7	Fossil	Colombia
290665-1	290665-1 34	18.18	1.94	-1.81	curamichatensis	15.7	Fossil	Colombia
290665-1	290665-1 35	14.62	1.73	-1.82	curamichatensis	15.7	Fossil	Colombia
290665-1	290665-1 36	11.06	1.3	-1.97	curamichatensis	15.7	Fossil	Colombia
290665-1	290665-1 37	7.5	2.03	-2.11	curamichatensis	15.7	Fossil	Colombia
290665-1	290665-1 38	4	0.96	-2.05	curamichatensis	15.7	Fossil	Colombia
290665-2	290665-2 1	139.55	1.79	-2.13	hubbardi	15.7	Fossil	Colombia
290665-2	290665-2 2	135.43	1.74	-2.14	hubbardi	15.7	Fossil	Colombia
290665-2	290665-2 3	132.24	1.58	-2.38	hubbardi	15.7	Fossil	Colombia
290665-2	290665-2 4	128.04	1.41	-2.35	hubbardi	15.7	Fossil	Colombia
290665-2	290665-2 5	124.96	2.04	-2.16	hubbardi	15.7	Fossil	Colombia
290665-2	290665-2 6	121.51	2.21	-2.21	hubbardi	15.7	Fossil	Colombia
290665-2	290665-2 7	117.16	2.66	-2.14	hubbardi	15.7	Fossil	Colombia
290665-2	290665-2 8	112.81	2.18	-1.44	hubbardi	15.7	Fossil	Colombia
290665-2	290665-2 9	108.46	2.46	-1.96	hubbardi	15.7	Fossil	Colombia
290665-2	290665-2 10	103.44	NA	NA	hubbardi	15.7	Fossil	Colombia
290665-2	290665-2 11	98.42	2.32	-1.21	hubbardi	15.7	Fossil	Colombia
290665-2	290665-2 12	95.7	2.21	-1.36	hubbardi	15.7	Fossil	Colombia
290665-2	290665-2 13	90.49	2.01	-1.62	hubbardi	15.7	Fossil	Colombia
290665-2	290665-2 14	85.28	2.3	-1.61	hubbardi	15.7	Fossil	Colombia
290665-2	290665-2 15	80.07	2.62	-1.57	hubbardi	15.7	Fossil	Colombia
290665-2	290665-2 16	74.86	2.06	-1.41	hubbardi	15.7	Fossil	Colombia
290665-2	290665-2 17	69.65	2.01	-1.61	hubbardi	15.7	Fossil	Colombia
290665-2	290665-2 18	64.44	2.12	-1.73	hubbardi	15.7	Fossil	Colombia
290665-2	290665-2 19	59.23	2.1	-1.15	hubbardi	15.7	Fossil	Colombia
290665-2	290665-2 20	55.66	2.22	-0.94	hubbardi	15.7	Fossil	Colombia
290665-2	290665-2 21	52.08	NA	NA	hubbardi	15.7	Fossil	Colombia
290665-2	290665-2 22	48.12	2.06	-1.71	hubbardi	15.7	Fossil	Colombia
290665-2	290665-2 23	44.16	2.35	-1.7	hubbardi	15.7	Fossil	Colombia
290665-2	290665-2 24	40.52	2.4	-1.71	hubbardi	15.7	Fossil	Colombia
290665-2	290665-2 25	36.88	2.58	-1.77	hubbardi	15.7	Fossil	Colombia
290665-2	290665-2 26	33.24	2.67	-1.7	hubbardi	15.7	Fossil	Colombia
290665-2	290665-2 27	29.6	2.44	-1.67	hubbardi	15.7	Fossil	Colombia
290665-2	290665-2 28	25.99	2.29	-1.76	hubbardi	15.7	Fossil	Colombia
290665-2	290665-2 29	23.36	2.66	-1.76	hubbardi	15.7	Fossil	Colombia
290665-2	290665-2 30	20.73	2.14	-1.97	hubbardi	15.7	Fossil	Colombia
290665-2	290665-2 31	16.73	2.36	-1.88	hubbardi	15.7	Fossil	Colombia
290665-2	290665-2 32	12.73	2.4	-1.96	hubbardi	15.7	Fossil	Colombia
290665-2	290665-2 33	9.8	2.12	-1.94	hubbardi	15.7	Fossil	Colombia
290665-2	290665-2 34	6.9	2.29	-1.79	hubbardi	15.7	Fossil	Colombia
290665-2	290665-2 35	4	2.08	-1.64	hubbardi	15.7	Fossil	Colombia
290665-A	665A - 1	237	-0.0543609	-2.55245	larensis	15.7	Fossil	Colombia
290665-A	665A - 2	192	0.345854	-2.5465	larensis	15.7	Fossil	Colombia
290665-A	665A - 3	158	0.385476	-2.74104	larensis	15.7	Fossil	Colombia
290665-A	665A - 4	128	1.02933	-2.59262	larensis	15.7	Fossil	Colombia
290665-A	665A - 5	100	0.673725	-2.368	larensis	15.7	Fossil	Colombia
290665-A	665A - 6	75	1.67021	-2.43719	larensis	15.7	Fossil	Colombia
290665-A	665A - 7	51	1.7663	-2.64878	larensis	15.7	Fossil	Colombia
290665-A	665A - 8	34	2.3418	-2.50037	larensis	15.7	Fossil	Colombia
290662-1	290662-1 1	261.62	1.53	-0.83	machapoorensis	14.9	Fossil	Colombia
290662-1	290662-1 2	257.71	1.25	-0.92	machapoorensis	14.9	Fossil	Colombia
290662-1	290662-1 3	252.83	1.64	-0.61	machapoorensis	14.9	Fossil	Colombia
290662-1	290662-1 4	249.22	1.69	-0.53	machapoorensis	14.9	Fossil	Colombia
290662-1	290662-1 5	244.47	1.87	-0.46	machapoorensis	14.9	Fossil	Colombia
290662-1	290662-1 6	239.72	1.95	-0.46	machapoorensis	14.9	Fossil	Colombia
290662-1	290662-1 7	234.48	2.04	-0.67	machapoorensis	14.9	Fossil	Colombia
290662-1	290662-1 8	229.51	2.19	-0.56	machapoorensis	14.9	Fossil	Colombia
290662-1	290662-1 9	224.54	1.81	-0.52	machapoorensis	14.9	Fossil	Colombia
290662-1	290662-1 10	220.88	1.82	-0.44	machapoorensis	14.9	Fossil	Colombia
290662-1	290662-1 11	215.21	2.07	-0.58	machapoorensis	14.9	Fossil	Colombia
290662-1	290662-1 12	209.54	2.32	-0.49	machapoorensis	14.9	Fossil	Colombia
290662-1	290662-1 13	204.73	2.45	-0.41	machapoorensis	14.9	Fossil	Colombia
290662-1	290662-1 14	199.92	2.32	-0.5	machapoorensis	14.9	Fossil	Colombia
290662-1	290662-1 15	195.11	2.42	-0.54	machapoorensis	14.9	Fossil	Colombia
290662-1	290662-1 16	190.3	2.5	-0.6	machapoorensis	14.9	Fossil	Colombia
290662-1	290662-1 17	185.49	2.49	-0.52	machapoorensis	14.9	Fossil	Colombia
290662-1	290662-1 18	179.77	2.59	-0.65	machapoorensis	14.9	Fossil	Colombia
290662-1	290662-1 19	175.14	2.5	-0.63	machapoorensis	14.9	Fossil	Colombia
290662-1	290662-1 20	170.51	2.33	-0.72	machapoorensis	14.9	Fossil	Colombia
290662-1	290662-1 21	165.88	2.35	-0.98	machapoorensis	14.9	Fossil	Colombia
290662-1	290662-1 22	161.25	2.31	-1.02	machapoorensis	14.9	Fossil	Colombia
290662-1	290662-1 23	156.62	2.24	-1.12	machapoorensis	14.9	Fossil	Colombia
290662-1	290662-1 24	151.99	1.67	-1.32	machapoorensis	14.9	Fossil	Colombia
290662-1	290662-1 25	147.36	2.04	-1.28	machapoorensis	14.9	Fossil	Colombia
290662-1	290662-1 26	142.73	2	-1.16	machapoorensis	14.9	Fossil	Colombia
290662-1	290662-1 27	137.19	2.08	-1.17	machapoorensis	14.9	Fossil	Colombia
290662-1	290662-1 28	130.14	2.01	-1.28	machapoorensis	14.9	Fossil	Colombia
290662-1	290662-1 29	125.56	2.29	-1.18	machapoorensis	14.9	Fossil	Colombia
290662-1	290662-1 30	120.98	2.27	-1.16	machapoorensis	14.9	Fossil	Colombia
290662-1	290662-1 31	116.4	2.37	-0.97	machapoorensis	14.9	Fossil	Colombia
290662-1	290662-1 32	111.82	2.74	-0.88	machapoorensis	14.9	Fossil	Colombia
290662-1	290662-1 33	107.24	2.93	-0.73	machapoorensis	14.9	Fossil	Colombia
290662-1	290662-1 34	102.55	2.45	-0.75	machapoorensis	14.9	Fossil	Colombia
290662-1	290662-1 35	97.86	2.72	-0.77	machapoorensis	14.9	Fossil	Colombia
290662-1	290662-1 36	93.17	2.66	-0.79	machapoorensis	14.9	Fossil	Colombia
290662-1	290662-1 37	88.48	2.49	-0.9	machapoorensis	14.9	Fossil	Colombia
290662-1	290662-1 38	83.79	2.47	-0.77	machapoorensis	14.9	Fossil	Colombia
290662-1	290662-1 39	79.1	2.57	-0.74	machapoorensis	14.9	Fossil	Colombia
290662-1	290662-1 40	75.08	2.62	-0.79	machapoorensis	14.9	Fossil	Colombia
290662-1	290662-1 41	71.06	2.58	-0.85	machapoorensis	14.9	Fossil	Colombia
290662-1	290662-1 42	67.04	1.95	-0.83	machapoorensis	14.9	Fossil	Colombia
290662-1	290662-1 43	64.04	2.69	-0.69	machapoorensis	14.9	Fossil	Colombia
290662-1	290662-1 44	61.04	2.53	-0.65	machapoorensis	14.9	Fossil	Colombia
290662-1	290662-1 45	58.04	2.62	-0.58	machapoorensis	14.9	Fossil	Colombia
290662-1	290662-1 46	55.04	2.83	-0.61	machapoorensis	14.9	Fossil	Colombia
290662-1	290662-1 47	52.04	2.87	-0.6	machapoorensis	14.9	Fossil	Colombia
290662-1	290662-1 48	49.04	2.85	-0.6	machapoorensis	14.9	Fossil	Colombia
290662-1	290662-1 49	46.04	2.93	-0.62	machapoorensis	14.9	Fossil	Colombia
290662-1	290662-1 50	43.04	2.93	-0.48	machapoorensis	14.9	Fossil	Colombia
290662-1	290662-1 51	40.04	2.87	-0.62	machapoorensis	14.9	Fossil	Colombia
290662-1	290662-1 52	37.04	2.78	-0.7	machapoorensis	14.9	Fossil	Colombia
290662-1	290662-1 53	34.04	2.72	-0.74	machapoorensis	14.9	Fossil	Colombia
290662-1	290662-1 54	31.66	2.66	-0.77	machapoorensis	14.9	Fossil	Colombia
290662-1	290662-1 55	29.28	2.52	-0.85	machapoorensis	14.9	Fossil	Colombia
290662-1	290662-1 56	26.9	2.6	-0.66	machapoorensis	14.9	Fossil	Colombia
290662-1	290662-1 57	24.52	2.51	-0.69	machapoorensis	14.9	Fossil	Colombia
290662-1	290662-1 58	22.14	2.6	-0.74	machapoorensis	14.9	Fossil	Colombia
290662-1	290662-1 59	19.76	2.6	-0.67	machapoorensis	14.9	Fossil	Colombia
290662-1	290662-1 60	17.38	NA	NA	machapoorensis	14.9	Fossil	Colombia
290662-1	290662-1 61	15	2.42	-0.63	machapoorensis	14.9	Fossil	Colombia
290662-2	290662-2 1	257.18	2.33	-1.8	larensis	14.9	Fossil	Colombia
290662-2	290662-2 2	253.53	2.62	-2.02	larensis	14.9	Fossil	Colombia
290662-2	290662-2 3	248.38	2.86	-1.58	larensis	14.9	Fossil	Colombia
290662-2	290662-2 4	243.23	2.37	-2.41	larensis	14.9	Fossil	Colombia
290662-2	290662-2 5	238.08	1.57	-2.64	larensis	14.9	Fossil	Colombia
290662-2	290662-2 6	232.93	2.39	-1.84	larensis	14.9	Fossil	Colombia
290662-2	290662-2 7	226.99	2.32	-1.28	larensis	14.9	Fossil	Colombia
290662-2	290662-2 8	221.05	2.28	-1.46	larensis	14.9	Fossil	Colombia
290662-2	290662-2 9	215.11	2.29	-1.42	larensis	14.9	Fossil	Colombia
290662-2	290662-2 10	209.17	2.49	-1.29	larensis	14.9	Fossil	Colombia
290662-2	290662-2 11	204.64	2.44	-1.18	larensis	14.9	Fossil	Colombia
290662-2	290662-2 12	200.11	2.47	-1.14	larensis	14.9	Fossil	Colombia
290662-2	290662-2 13	194.5	2.86	-1.18	larensis	14.9	Fossil	Colombia
290662-2	290662-2 14	189.6	2.91	-1.23	larensis	14.9	Fossil	Colombia
290662-2	290662-2 15	184.14	3.05	-1.29	larensis	14.9	Fossil	Colombia
290662-2	290662-2 16	177.79	2.75	-1.25	larensis	14.9	Fossil	Colombia
290662-2	290662-2 17	171.44	2.58	-1.38	larensis	14.9	Fossil	Colombia
290662-2	290662-2 18	165.09	2.74	-1.5	larensis	14.9	Fossil	Colombia
290662-2	290662-2 19	160.19	2.7	-1.66	larensis	14.9	Fossil	Colombia
290662-2	290662-2 20	153.84	1.91	-2.06	larensis	14.9	Fossil	Colombia
290662-2	290662-2 21	149.09	2.23	-2.32	larensis	14.9	Fossil	Colombia
290662-2	290662-2 22	140.83	NA	NA	larensis	14.9	Fossil	Colombia
290662-2	290662-2 23	135.43	1.84	-2.86	larensis	14.9	Fossil	Colombia
290662-2	290662-2 24	130.03	1.8	-2.85	larensis	14.9	Fossil	Colombia
290662-2	290662-2 25	124.63	2.48	-2.79	larensis	14.9	Fossil	Colombia
290662-2	290662-2 26	119.23	2.37	-2.88	larensis	14.9	Fossil	Colombia
290662-2	290662-2 27	113.83	2.27	-2.88	larensis	14.9	Fossil	Colombia
290662-2	290662-2 28	108.43	2.23	-2.96	larensis	14.9	Fossil	Colombia
290662-2	290662-2 29	103.03	2.29	-2.88	larensis	14.9	Fossil	Colombia
290662-2	290662-2 30	99.13	2.21	-2.89	larensis	14.9	Fossil	Colombia
290662-2	290662-2 31	95.23	2.32	-2.93	larensis	14.9	Fossil	Colombia
290662-2	290662-2 32	90.31	2.54	-3.01	larensis	14.9	Fossil	Colombia
290662-2	290662-2 33	85.39	NA	NA	larensis	14.9	Fossil	Colombia
290662-2	290662-2 34	80.47	1.87	-3.11	larensis	14.9	Fossil	Colombia
290662-2	290662-2 35	75.72	1.86	-2.98	larensis	14.9	Fossil	Colombia
290662-2	290662-2 36	70.97	2.14	-3.04	larensis	14.9	Fossil	Colombia
290662-2	290662-2 37	66.49	1.62	-3.15	larensis	14.9	Fossil	Colombia
290662-2	290662-2 38	62.02	NA	NA	larensis	14.9	Fossil	Colombia
290662-2	290662-2 39	58.93	NA	NA	larensis	14.9	Fossil	Colombia
290662-2	290662-2 40	55.84	NA	NA	larensis	14.9	Fossil	Colombia
290662-2	290662-2 41	51.31	1.8	-2.81	larensis	14.9	Fossil	Colombia
290662-2	290662-2 42	46.78	1.67	-2.81	larensis	14.9	Fossil	Colombia
290662-2	290662-2 43	43.24	1.82	-2.73	larensis	14.9	Fossil	Colombia
290662-2	290662-2 44	39.7	NA	NA	larensis	14.9	Fossil	Colombia
290662-2	290662-2 45	35.34	2.17	-2.74	larensis	14.9	Fossil	Colombia
290662-2	290662-2 46	30.98	2.1	-2.34	larensis	14.9	Fossil	Colombia
290662-2	290662-2 47	26.62	2.1	-2.84	larensis	14.9	Fossil	Colombia
290662-2	290662-2 48	22.26	1.87	-2.87	larensis	14.9	Fossil	Colombia
290662-2	290662-2 49	20.26	1.89	-2.73	larensis	14.9	Fossil	Colombia
290662-2	290662-2 50	18.26	1.84	-2.68	larensis	14.9	Fossil	Colombia
290662-2	290662-2 51	16.26	NA	NA	larensis	14.9	Fossil	Colombia
290662-2	290662-2 52	13.86	2.04	-2.9	larensis	14.9	Fossil	Colombia
290662-2	290662-2 53	11.43	1.98	-2.87	larensis	14.9	Fossil	Colombia
290662-2	290662-2 54	9	2.02	-2.94	larensis	14.9	Fossil	Colombia
290662-3	290662-3 1	207.37	1.62	-3.04	larensis	14.9	Fossil	Colombia
290662-3	290662-3 2	203.5	1.1	-2.81	larensis	14.9	Fossil	Colombia
290662-3	290662-3 3	198.25	1.91	-2.21	larensis	14.9	Fossil	Colombia
290662-3	290662-3 4	193	2.02	-1.85	larensis	14.9	Fossil	Colombia
290662-3	290662-3 5	187.75	2.12	-1.78	larensis	14.9	Fossil	Colombia
290662-3	290662-3 6	183.91	1.89	-1.9	larensis	14.9	Fossil	Colombia
290662-3	290662-3 7	179.33	2.08	-1.45	larensis	14.9	Fossil	Colombia
290662-3	290662-3 8	174.1	2.3	-1.18	larensis	14.9	Fossil	Colombia
290662-3	290662-3 9	168.65	2.27	-1.35	larensis	14.9	Fossil	Colombia
290662-3	290662-3 10	163.2	2.68	-1.2	larensis	14.9	Fossil	Colombia
290662-3	290662-3 11	157.75	2.89	-1.24	larensis	14.9	Fossil	Colombia
290662-3	290662-3 12	153.72	2.59	-0.89	larensis	14.9	Fossil	Colombia
290662-3	290662-3 13	149.69	2.58	-1.03	larensis	14.9	Fossil	Colombia
290662-3	290662-3 14	145.66	2.58	-1.2	larensis	14.9	Fossil	Colombia
290662-3	290662-3 15	140.36	2.4	-1.64	larensis	14.9	Fossil	Colombia
290662-3	290662-3 16	135.06	2.35	-2.54	larensis	14.9	Fossil	Colombia
290662-3	290662-3 17	129.76	2.45	-2.54	larensis	14.9	Fossil	Colombia
290662-3	290662-3 18	124.46	2.41	-2.78	larensis	14.9	Fossil	Colombia
290662-3	290662-3 19	119.16	1.75	-3.11	larensis	14.9	Fossil	Colombia
290662-3	290662-3 20	113.86	2.11	-3.09	larensis	14.9	Fossil	Colombia
290662-3	290662-3 21	107.82	2.13	-3.14	larensis	14.9	Fossil	Colombia
290662-3	290662-3 22	101.78	2.19	-3.21	larensis	14.9	Fossil	Colombia
290662-3	290662-3 23	95.74	2.14	-3.24	larensis	14.9	Fossil	Colombia
290662-3	290662-3 24	89.7	2.36	-3.28	larensis	14.9	Fossil	Colombia
290662-3	290662-3 25	83.66	2.32	-3.2	larensis	14.9	Fossil	Colombia
290662-3	290662-3 26	79.11	NA	NA	larensis	14.9	Fossil	Colombia
290662-3	290662-3 27	74.56	2.02	-3.23	larensis	14.9	Fossil	Colombia
290662-3	290662-3 28	69.26	2.22	-3.28	larensis	14.9	Fossil	Colombia
290662-3	290662-3 29	63.96	2.16	-3.27	larensis	14.9	Fossil	Colombia
290662-3	290662-3 30	58.66	1.63	-3.27	larensis	14.9	Fossil	Colombia
290662-3	290662-3 31	53.19	1.94	-3.22	larensis	14.9	Fossil	Colombia
290662-3	290662-3 32	47.72	1.54	-3.18	larensis	14.9	Fossil	Colombia
290662-3	290662-3 33	42.25	1.74	-3.09	larensis	14.9	Fossil	Colombia
290662-3	290662-3 34	38.92	2.01	-3.11	larensis	14.9	Fossil	Colombia
290662-3	290662-3 35	32.96	1.75	-3.04	larensis	14.9	Fossil	Colombia
290662-3	290662-3 36	29.26	1.74	-3.07	larensis	14.9	Fossil	Colombia
290662-3	290662-3 37	24.3	1.39	-2.93	larensis	14.9	Fossil	Colombia
290662-3	290662-3 38	19.8	1.8	-3.02	larensis	14.9	Fossil	Colombia
290662-3	290662-3 39	16.3	1.55	-3.05	larensis	14.9	Fossil	Colombia
290662-3	290662-3 40	12.8	1.75	-2.97	larensis	14.9	Fossil	Colombia
290662-3	290662-3 41	9.9	1.71	-2.99	larensis	14.9	Fossil	Colombia
290662-3	290662-3 42	7	1.78	-3.05	larensis	14.9	Fossil	Colombia
290832-1	290832-1 1	156.88	2.48	-2.59	falconensis	14.9	Fossil	Colombia
290832-1	290832-1 2	150.47	2.14	-2.53	falconensis	14.9	Fossil	Colombia
290832-1	290832-1 3	145.49	1.97	-2.54	falconensis	14.9	Fossil	Colombia
290832-1	290832-1 4	140.51	2.22	-2.36	falconensis	14.9	Fossil	Colombia
290832-1	290832-1 5	135.53	2.19	-2.3	falconensis	14.9	Fossil	Colombia
290832-1	290832-1 6	129.28	2.16	-2.37	falconensis	14.9	Fossil	Colombia
290832-1	290832-1 7	123.03	2.12	-2.21	falconensis	14.9	Fossil	Colombia
290832-1	290832-1 8	115.8	2.75	-2.1	falconensis	14.9	Fossil	Colombia
290832-1	290832-1 9	111.87	2.74	-2.01	falconensis	14.9	Fossil	Colombia
290832-1	290832-1 10	107.14	2.52	-1.97	falconensis	14.9	Fossil	Colombia
290832-1	290832-1 11	101.46	2.64	-1.83	falconensis	14.9	Fossil	Colombia
290832-1	290832-1 12	95.12	2.67	-1.66	falconensis	14.9	Fossil	Colombia
290832-1	290832-1 13	91.22	2.35	-1.48	falconensis	14.9	Fossil	Colombia
290832-1	290832-1 14	85.93	2.56	-1.43	falconensis	14.9	Fossil	Colombia
290832-1	290832-1 15	80.64	2.36	-1.4	falconensis	14.9	Fossil	Colombia
290832-1	290832-1 16	75.35	2.43	-1.31	falconensis	14.9	Fossil	Colombia
290832-1	290832-1 17	70.95	2.62	-1.14	falconensis	14.9	Fossil	Colombia
290832-1	290832-1 18	66.55	2.65	-0.99	falconensis	14.9	Fossil	Colombia
290832-1	290832-1 19	62.15	2.7	-0.77	falconensis	14.9	Fossil	Colombia
290832-1	290832-1 20	57.75	2.72	-0.7	falconensis	14.9	Fossil	Colombia
290832-1	290832-1 21	54.58	2.69	-0.7	falconensis	14.9	Fossil	Colombia
290832-1	290832-1 22	51.4	2.67	-0.72	falconensis	14.9	Fossil	Colombia
290832-1	290832-1 23	47.66	2.76	-0.78	falconensis	14.9	Fossil	Colombia
290832-1	290832-1 24	43.92	2.69	-0.77	falconensis	14.9	Fossil	Colombia
290832-1	290832-1 26	40.18	2.66	-0.59	falconensis	14.9	Fossil	Colombia
290832-1	290832-1 27	36.43	2.67	-0.71	falconensis	14.9	Fossil	Colombia
290832-1	290832-1 28	32.68	2.68	-0.59	falconensis	14.9	Fossil	Colombia
290832-1	290832-1 29	26.19	2.82	-0.53	falconensis	14.9	Fossil	Colombia
290832-1	290832-1 30	22.2	2.89	-1	falconensis	14.9	Fossil	Colombia
290832-1	290832-1 31	18.21	2.93	-1.03	falconensis	14.9	Fossil	Colombia
290832-1	290832-1 32	14.22	2.96	-1.48	falconensis	14.9	Fossil	Colombia
290832-1	290832-1 33	10.23	3.06	-1.68	falconensis	14.9	Fossil	Colombia
290832-1	290832-1 34	7	2.99	-2.01	falconensis	14.9	Fossil	Colombia
290662-A	662A-1	270	1.94162	-2.8704	machapoorensis	14.9	Fossil	Colombia
290662-A	662A-2	250	2.22492	-2.18549	machapoorensis	14.9	Fossil	Colombia
290662-A	662A-3	233	2.58548	-1.74827	machapoorensis	14.9	Fossil	Colombia
290662-A	662A-4	216	2.50128	-1.48052	machapoorensis	14.9	Fossil	Colombia
290662-A	662A-5	195	2.66968	-1.69913	machapoorensis	14.9	Fossil	Colombia
290662-A	662A-6	175	2.67166	-1.59384	machapoorensis	14.9	Fossil	Colombia
290662-A	662A-7	135	2.58152	-1.70214	machapoorensis	14.9	Fossil	Colombia
290662-A	662A-8	90	2.91731	-1.47551	machapoorensis	14.9	Fossil	Colombia
290662-A	662A-9	55	2.89255	-2.16543	machapoorensis	14.9	Fossil	Colombia
290662-A	662A-10	25	2.89552	-2.34995	machapoorensis	14.9	Fossil	Colombia
290662-B	662B - 1	258	1.93073	-2.94761	machapoorensis	14.9	Fossil	Colombia
290662-B	662B - 2	198	2.61718	-1.28598	machapoorensis	14.9	Fossil	Colombia
290662-B	662B - 3	146	2.85392	-1.23383	machapoorensis	14.9	Fossil	Colombia
290662-B	662B - 4	101	2.94406	-1.72922	machapoorensis	14.9	Fossil	Colombia
290662-B	662B - 5	66	2.79223	-2.3769	machapoorensis	14.9	Fossil	Colombia
290662-B	662B - 6	37	2.58152	-2.60165	machapoorensis	14.9	Fossil	Colombia
290662-B	662B - 7	14	2.70534	-2.42516	machapoorensis	14.9	Fossil	Colombia
290628-1	290628-1 1	171	1.58	-0.97	variegata	0	Modern	Colombia
290628-1	290628-1 2	168	1.59	-1.17	variegata	0	Modern	Colombia
290628-1	290628-1 3	165	1.26	-1.05	variegata	0	Modern	Colombia
290628-1	290628-1 4	162	1.72	-0.86	variegata	0	Modern	Colombia
290628-1	290628-1 5	159	1.41	-0.83	variegata	0	Modern	Colombia
290628-1	290628-1 6	157	1.57	-0.67	variegata	0	Modern	Colombia
290628-1	290628-1 7	153	1.82	-0.68	variegata	0	Modern	Colombia
290628-1	290628-1 8	148	2.28	-0.56	variegata	0	Modern	Colombia
290628-1	290628-1 9	142	1.78	-0.67	variegata	0	Modern	Colombia
290628-1	290628-1 10	139	1.47	-0.82	variegata	0	Modern	Colombia
290628-1	290628-1 11	136	1.61	-0.54	variegata	0	Modern	Colombia
290628-1	290628-1 12	133	2.15	-0.34	variegata	0	Modern	Colombia
290628-1	290628-1 13	129	2.32	-0.38	variegata	0	Modern	Colombia
290628-1	290628-1 14	126	1.87	-0.16	variegata	0	Modern	Colombia
290628-1	290628-1 15	122	2.25	-0.46	variegata	0	Modern	Colombia
290628-1	290628-1 16	117	2.31	-0.5	variegata	0	Modern	Colombia
290628-1	290628-1 17	113	2.46	-0.45	variegata	0	Modern	Colombia
290628-1	290628-1 18	109	2.51	-0.39	variegata	0	Modern	Colombia
290628-1	290628-1 19	106	2.46	-0.32	variegata	0	Modern	Colombia
290628-1	290628-1 20	103	2.12	-0.34	variegata	0	Modern	Colombia
290628-1	290628-1 21	98	2.36	-0.47	variegata	0	Modern	Colombia
290628-1	290628-1 22	95	2.15	-0.54	variegata	0	Modern	Colombia
290628-1	290628-1 23	91	2.07	-0.54	variegata	0	Modern	Colombia
290628-1	290628-1 24	86	2.37	-0.36	variegata	0	Modern	Colombia
290628-1	290628-1 25	83	2.38	-0.35	variegata	0	Modern	Colombia
290628-1	290628-1 26	79	2.57	-0.44	variegata	0	Modern	Colombia
290628-1	290628-1 27	74	2.61	-0.61	variegata	0	Modern	Colombia
290628-1	290628-1 28	71	2.49	-0.81	variegata	0	Modern	Colombia
290628-1	290628-1 29	68	2.51	-0.72	variegata	0	Modern	Colombia
290628-1	290628-1 30	65	2.67	-0.76	variegata	0	Modern	Colombia
290628-1	290628-1 31	62	2.75	-0.85	variegata	0	Modern	Colombia
290628-1	290628-1 32	58	2.82	-0.94	variegata	0	Modern	Colombia
290628-1	290628-1 33	54	2.83	-1.12	variegata	0	Modern	Colombia
290628-1	290628-1 34	49	2.71	-1.16	variegata	0	Modern	Colombia
290628-1	290628-1 35	46	2.68	-1.15	variegata	0	Modern	Colombia
290628-1	290628-1 36	43	2.54	-1.26	variegata	0	Modern	Colombia
290628-1	290628-1 37	40	2.6	-1.19	variegata	0	Modern	Colombia
290628-1	290628-1 38	37	2.62	-1.12	variegata	0	Modern	Colombia
290628-1	290628-1 39	33	2.62	-1.15	variegata	0	Modern	Colombia
290628-1	290628-1 40	28	2.52	-1.18	variegata	0	Modern	Colombia
290628-1	290628-1 41	26	2.54	-1.16	variegata	0	Modern	Colombia
290628-1	290628-1 42	24	2.3	-1.26	variegata	0	Modern	Colombia
290628-1	290628-1 43	21	2.25	-1.19	variegata	0	Modern	Colombia
290628-1	290628-1 44	17	2.29	-1.2	variegata	0	Modern	Colombia
290628-1	290628-1 45	14	2.28	-1.04	variegata	0	Modern	Colombia
290628-1	290628-1 46	11	2.22	-1.01	variegata	0	Modern	Colombia
290628-1	290628-1 47	7	2.07	-0.87	variegata	0	Modern	Colombia
290628-A	628A-1	139	2.00403	-0.68029	variegata	0	Modern	Colombia
290628-A	628A-1.1	125	2.01167	-0.51452	variegata	0	Modern	Colombia
290628-A	628A-1.2	122	1.9309	-0.441684	variegata	0	Modern	Colombia
290628-A	628-1.3	118	1.78629	-0.547002	variegata	0	Modern	Colombia
290628-A	628-1.4	116	1.81721	-0.356052	variegata	0	Modern	Colombia
290628-A	628-1.5	114	1.84014	-0.520426	variegata	0	Modern	Colombia
290628-A	628A-2	106	1.84059	-0.488756	variegata	0	Modern	Colombia
290628-A	629A-2.1	102	NA	NA	variegata	0	Modern	Colombia
290628-A	628A-2.2	96	1.7444	-0.532237	variegata	0	Modern	Colombia
290628-A	628A-2.3	92	1.65465	-0.567671	variegata	0	Modern	Colombia
290628-A	628A-2.4	89	1.65565	-0.517473	variegata	0	Modern	Colombia
290628-A	628A-2.5	85	1.52002	-0.400344	variegata	0	Modern	Colombia
290628-A	628A-3	77	1.88615	-0.684302	variegata	0	Modern	Colombia
290628-A	628A-3.1	74	1.68856	-0.365895	variegata	0	Modern	Colombia
290628-A	628A-3.2	70	1.75837	-0.585388	variegata	0	Modern	Colombia
290628-A	628A-3.3	67	2.00469	-0.474165	variegata	0	Modern	Colombia
290628-A	628A-3.4	64	2.06353	-0.497788	variegata	0	Modern	Colombia
290628-A	628A-3.5	57	2.11639	-0.500741	variegata	0	Modern	Colombia
290628-A	628A-4	53	1.83167	-0.677282	variegata	0	Modern	Colombia
290628-A	628A-4.1	50	1.80324	-0.602121	variegata	0	Modern	Colombia
290628-A	628A-4.2	47	1.71748	-0.689722	variegata	0	Modern	Colombia
290628-A	628A-4.3	43	1.76136	-0.510583	variegata	0	Modern	Colombia
290628-A	628A-4.4	39	1.70451	-0.804882	variegata	0	Modern	Colombia
290628-A	628A-4.5	36	1.57287	-0.526332	variegata	0	Modern	Colombia
290628-A	628A-TIP	0	1.58683	-0.986973	variegata	0	Modern	Colombia
Gon-VenA	Gon-VenA-1	357	2.18426	-0.0896437	gonostoma	0	Modern	Venezuela
Gon-VenA	Gon-VenA-2	347	1.96313	0.0989498	gonostoma	0	Modern	Venezuela
Gon-VenA	Gon-VenA-3	333	2.21016	-0.136051	gonostoma	0	Modern	Venezuela
Gon-VenA	Gon-VenA-4	323	2.28786	0.0940128	gonostoma	0	Modern	Venezuela
Gon-VenA	Gon-VenA-5	309	2.48908	-0.188384	gonostoma	0	Modern	Venezuela
Gon-VenA	Gon-VenA-6	299	2.27391	0.462313	gonostoma	0	Modern	Venezuela
Gon-VenA	Gon-VenA-7	285	2.24104	0.173992	gonostoma	0	Modern	Venezuela
Gon-VenA	Gon-VenA-8	273	2.10458	0.300379	gonostoma	0	Modern	Venezuela
Gon-VenA	Gon-VenA-9	259	2.13047	0.24311	gonostoma	0	Modern	Venezuela
Gon-VenA	Gon-VenA-10	246	2.0717	0.191765	gonostoma	0	Modern	Venezuela
Gon-VenA	Gon-VenA-11	236	2.28786	0.242123	gonostoma	0	Modern	Venezuela
Gon-VenA	Gon-VenA-12	219	2.38946	0.0732774	gonostoma	0	Modern	Venezuela
Gon-VenA	Gon-VenA-13	205	2.41337	0.237186	gonostoma	0	Modern	Venezuela
Gon-VenA	Gon-VenA-14	188	2.14143	0.150295	gonostoma	0	Modern	Venezuela
Gon-VenA	Gon-VenA-15	173	2.1753	0.102899	gonostoma	0	Modern	Venezuela
Gon-VenA	Gon-VenA-16	151	2.50302	-0.279225	gonostoma	0	Modern	Venezuela
Gon-VenA	Gon-VenA-17	130	2.7909	-0.47078	gonostoma	0	Modern	Venezuela
Gon-VenA	Gon-VenA-18	110	2.60462	-0.576432	gonostoma	0	Modern	Venezuela
Gon-VenA	Gon-VenA-19	90	2.41337	-0.428322	gonostoma	0	Modern	Venezuela
Gon-VenA	Gon-VenA-20	72	2.44027	-0.325632	gonostoma	0	Modern	Venezuela
Gon-VenA	Gon-VenA-21	57	2.48808	-0.526075	gonostoma	0	Modern	Venezuela
Gon-VenA	Gon-VenA-22	35	2.66439	-0.424372	gonostoma	0	Modern	Venezuela
Gon-VenA	Gon-VenA-23	18	2.61459	-0.578407	gonostoma	0	Modern	Venezuela
Gon-VenB	Gon-VenB-1	264	1.40132	-0.00670205	gonostoma	0	Modern	Venezuela
Gon-VenB	Gon-VenB-2	249	1.6115	-0.318721	gonostoma	0	Modern	Venezuela
Gon-VenB	Gon-VenB-3	229	1.69717	-0.169623	gonostoma	0	Modern	Venezuela
Gon-VenB	Gon-VenB-4	213	1.82068	0.21645	gonostoma	0	Modern	Venezuela
Gon-VenB	Gon-VenB-5	197	1.3814	-0.328595	gonostoma	0	Modern	Venezuela
Gon-VenB	Gon-VenB-6	179	1.73203	0.206576	gonostoma	0	Modern	Venezuela
Gon-VenB	Gon-VenB-7	154	1.96612	0.128572	gonostoma	0	Modern	Venezuela
Gon-VenB	Gon-VenB-8	134	2.08864	0.0387184	gonostoma	0	Modern	Venezuela
Gon-VenB	Gon-VenB-9	116	1.97807	-0.141976	gonostoma	0	Modern	Venezuela
Gon-VenB	Gon-VenB-10	99	2.35062	-0.0787823	gonostoma	0	Modern	Venezuela
Gon-VenB	Gon-VenB-11	83	2.00696	-0.168636	gonostoma	0	Modern	Venezuela
Gon-VenB	Gon-VenB-12	67	1.83363	-0.331557	gonostoma	0	Modern	Venezuela
Gon-VenB	Gon-VenB-13	57	1.83264	-0.305884	gonostoma	0	Modern	Venezuela
Gon-VenB	Gon-VenB-14	51	1.81769	-0.574457	gonostoma	0	Modern	Venezuela
Gon-VenB	Gon-VenB-15	42	2.21514	-0.597167	gonostoma	0	Modern	Venezuela
Gon-VenB	Gon-VenB-16	29	2.49206	-0.482629	gonostoma	0	Modern	Venezuela
Gon-VenB	Gon-VenB-17	14	2.52593	-0.206157	gonostoma	0	Modern	Venezuela
Var-JamA	Var-JamA-1	344	1.9	-1.04	variegata	0	Modern	Jamaica
Var-JamA	Var-JamA-2	334	2.48	-1.3	variegata	0	Modern	Jamaica
Var-JamA	Var-JamA-3	324	2.71	-1.38	variegata	0	Modern	Jamaica
Var-JamA	Var-JamA-4	312	2.61	-1.39	variegata	0	Modern	Jamaica
Var-JamA	Var-JamA-5	301	2.58	-1.12	variegata	0	Modern	Jamaica
Var-JamA	Var-JamA-6	293	2.48	-0.91	variegata	0	Modern	Jamaica
Var-JamA	Var-JamA-7	282	2.39	-0.14	variegata	0	Modern	Jamaica
Var-JamA	Var-JamA-8	269	2.8	-0.31	variegata	0	Modern	Jamaica
Var-JamA	Var-JamA-9	258	2.38	-0.05	variegata	0	Modern	Jamaica
Var-JamA	Var-JamA-10	247	2.7	-0.32	variegata	0	Modern	Jamaica
Var-JamA	Var-JamA-11	239	2.85	-0.6	variegata	0	Modern	Jamaica
Var-JamA	Var-JamA-12	229	2.43	-0.08	variegata	0	Modern	Jamaica
Var-JamA	Var-JamA-13	219	2.83	-0.31	variegata	0	Modern	Jamaica
Var-JamA	Var-JamA-14	207	2.88	-0.27	variegata	0	Modern	Jamaica
Var-JamA	Var-JamA-15	201	2.87	-0.17	variegata	0	Modern	Jamaica
Var-JamA	Var-JamA-16	190	2.95	0.06	variegata	0	Modern	Jamaica
Var-JamA	Var-JamA-17	177	2.97	0.02	variegata	0	Modern	Jamaica
Var-JamA	Var-JamA-18	165	2.94	0.14	variegata	0	Modern	Jamaica
Var-JamA	Var-JamA-19	150	3.07	-0.06	variegata	0	Modern	Jamaica
Var-JamA	Var-JamA-20	137	3.28	0.03	variegata	0	Modern	Jamaica
Var-JamA	Var-JamA-21	122	3.23	-0.09	variegata	0	Modern	Jamaica
Var-JamA	Var-JamA-22	108	3.39	-0.16	variegata	0	Modern	Jamaica
Var-JamA	Var-JamA-23	91	3.5	-0.5	variegata	0	Modern	Jamaica
Var-JamA	Var-JamA-24	81	3.52	-0.55	variegata	0	Modern	Jamaica
Var-JamA	Var-JamA-25	65	3.52	-1.015	variegata	0	Modern	Jamaica
Var-JamA	Var-JamA-26	51	3.42	-1.25	variegata	0	Modern	Jamaica
Var-JamA	Var-JamA-27	36	3.4	-1.53	variegata	0	Modern	Jamaica
Var-JamA	Var-JamA-28	21	3.415	-1.635	variegata	0	Modern	Jamaica
Var-JamB	Var-JamB-1	203	2.465	-0.88	variegata	0	Modern	Jamaica
Var-JamB	Var-JamB-2	193	2.485	-0.83	variegata	0	Modern	Jamaica
Var-JamB	Var-JamB-3	185	2.655	-0.595	variegata	0	Modern	Jamaica
Var-JamB	Var-JamB-4	173	2.72	-0.62	variegata	0	Modern	Jamaica
Var-JamB	Var-JamB-5	161	2.78	-0.505	variegata	0	Modern	Jamaica
Var-JamB	Var-JamB-6	152	2.615	-0.6	variegata	0	Modern	Jamaica
Var-JamB	Var-JamB-7	142	2.57	-0.475	variegata	0	Modern	Jamaica
Var-JamB	Var-JamB-8	130	2.71	-0.245	variegata	0	Modern	Jamaica
Var-JamB	Var-JamB-9	119	2.75	-0.355	variegata	0	Modern	Jamaica
Var-JamB	Var-JamB-10	112	2.87	-0.49	variegata	0	Modern	Jamaica
Var-JamB	Var-JamB-11	100	2.59	-0.595	variegata	0	Modern	Jamaica
Var-JamB	Var-JamB-12	91	2.72	-0.68	variegata	0	Modern	Jamaica
Var-JamB	Var-JamB-13	80	2.855	-0.74	variegata	0	Modern	Jamaica
Var-JamB	Var-JamB-14	68	2.9	-0.64	variegata	0	Modern	Jamaica
Var-JamB	Var-JamB-15	59	2.965	-0.61	variegata	0	Modern	Jamaica
Var-JamB	Var-JamB-16	45	3.16	-0.645	variegata	0	Modern	Jamaica
Var-JamB	Var-JamB-17	32	3.12	-0.77	variegata	0	Modern	Jamaica
Gon-Mex	Gon-Mex-1	377	2.61	-1.53	gonostoma	0	Modern	Mexico
Gon-Mex	Gon-Mex-2	368	2.76	-1.59	gonostoma	0	Modern	Mexico
Gon-Mex	Gon-Mex-3	360	2.64	-1.54	gonostoma	0	Modern	Mexico
Gon-Mex	Gon-Mex-4	352	2.46	-1.33	gonostoma	0	Modern	Mexico
Gon-Mex	Gon-Mex-5	343	2.49	-1.04	gonostoma	0	Modern	Mexico
Gon-Mex	Gon-Mex-6	335	2.58	-1.16	gonostoma	0	Modern	Mexico
Gon-Mex	Gon-Mex-7	326	2.52	-0.76	gonostoma	0	Modern	Mexico
Gon-Mex	Gon-Mex-8	317	2.62	-0.35	gonostoma	0	Modern	Mexico
Gon-Mex	Gon-Mex-9	307	2.67	-0.22	gonostoma	0	Modern	Mexico
Gon-Mex	Gon-Mex-10	297	2.22	0.04	gonostoma	0	Modern	Mexico
Gon-Mex	Gon-Mex-11	287	2.43	0.14	gonostoma	0	Modern	Mexico
Gon-Mex	Gon-Mex-12	278	2.82	0.41	gonostoma	0	Modern	Mexico
Gon-Mex	Gon-Mex-13	268	2.74	0.19	gonostoma	0	Modern	Mexico
Gon-Mex	Gon-Mex-14	259	2.88	0.29	gonostoma	0	Modern	Mexico
Gon-Mex	Gon-Mex-15	251	2.66	0.17	gonostoma	0	Modern	Mexico
Gon-Mex	Gon-Mex-16	243	2.86	0.23	gonostoma	0	Modern	Mexico
Gon-Mex	Gon-Mex-17	234	2.71	0.23	gonostoma	0	Modern	Mexico
Gon-Mex	Gon-Mex-18	226	2.77	0	gonostoma	0	Modern	Mexico
Gon-Mex	Gon-Mex-19	218	2.95	-0.44	gonostoma	0	Modern	Mexico
Gon-Mex	Gon-Mex-20	207	2.82	-0.84	gonostoma	0	Modern	Mexico
Gon-Mex	Gon-Mex-21	197	2.86	-1.3	gonostoma	0	Modern	Mexico
Gon-Mex	Gon-Mex-22	187	3.08	-1.57	gonostoma	0	Modern	Mexico
Gon-Mex	Gon-Mex-23	178	3.15	-1.75	gonostoma	0	Modern	Mexico
Gon-Mex	Gon-Mex-24	166	3	-1.79	gonostoma	0	Modern	Mexico
Gon-Mex	Gon-Mex-25	156	3.05	-1.57	gonostoma	0	Modern	Mexico
Gon-Mex	Gon-Mex-26	146	3.2	-1.93	gonostoma	0	Modern	Mexico
Gon-Mex	Gon-Mex-27	136	3.04	-1.8	gonostoma	0	Modern	Mexico
Gon-Mex	Gon-Mex-28	127	3.05	-1.76	gonostoma	0	Modern	Mexico
Gon-Mex	Gon-Mex-29	113	3.26	-0.33	gonostoma	0	Modern	Mexico
Gon-Mex	Gon-Mex-30	101	2.88	-1.55	gonostoma	0	Modern	Mexico
Gon-Mex	Gon-Mex-31	92	3.03	-1.54	gonostoma	0	Modern	Mexico
Gon-Mex	Gon-Mex-32	84	3.15	-1.48	gonostoma	0	Modern	Mexico
Gon-Mex	Gon-Mex-33	76	3.29	-1.53	gonostoma	0	Modern	Mexico
Gon-Mex	Gon-Mex-34	69	3.39	-1.48	gonostoma	0	Modern	Mexico
Gon-Mex	Gon-Mex-35	61	3.24	-1.27	gonostoma	0	Modern	Mexico
Gon-Mex	Gon-Mex-36	54	3.06	-1.11	gonostoma	0	Modern	Mexico
Gon-Mex	Gon-Mex-37	45	3.17	-1.26	gonostoma	0	Modern	Mexico
Gon-Mex	Gon-Mex-38	36	3.16	-1.09	gonostoma	0	Modern	Mexico
Gon-Mex	Gon-Mex-39	27	3.23	-1.06	gonostoma	0	Modern	Mexico
Gon-Mex	Gon-Mex-40	20	3.38	-0.8	gonostoma	0	Modern	Mexico
Leu-Mex	Leu-Mex-1	0	1.8	-1.76	leucostoma	0	Modern	Mexico
Leu-Mex	Leu-Mex-2	24	1.68	-0.63	leucostoma	0	Modern	Mexico
Leu-Mex	Leu-Mex-3	59	2.34	-1.31	leucostoma	0	Modern	Mexico
Leu-Mex	Leu-Mex-4	81	2.22	-0.67	leucostoma	0	Modern	Mexico
Leu-Mex	Leu-Mex-5	98	2.15	-0.14	leucostoma	0	Modern	Mexico
Leu-Mex	Leu-Mex-6	121	3.03	-1.38	leucostoma	0	Modern	Mexico
Leu-Mex	Leu-Mex-7	140	2.45	-1.29	leucostoma	0	Modern	Mexico
Leu-Mex	Leu-Mex-8	158	2.83	-1.51	leucostoma	0	Modern	Mexico
Leu-Mex	Leu-Mex-9	174	2.65	-1.46	leucostoma	0	Modern	Mexico
Leu-Mex	Leu-Mex-10	199	2.95	-1.4	leucostoma	0	Modern	Mexico
Leu-Mex	Leu-Mex-11	213	2.89	-1.42	leucostoma	0	Modern	Mexico
Leu-Mex	Leu-Mex-12	227	2.61	-1.52	leucostoma	0	Modern	Mexico
Leu-Mex	Leu-Mex-13	240	2.82	-1.74	leucostoma	0	Modern	Mexico
Leu-Mex	Leu-Mex-14	257	2.78	-1.32	leucostoma	0	Modern	Mexico
Leu-Mex	Leu-Mex-15	277	2.82	-1.06	leucostoma	0	Modern	Mexico
Leu-Mex	Leu-Mex-16	293	2.66	-1.4	leucostoma	0	Modern	Mexico
Leu-Mex	Leu-Mex-17	311	2.85	-1.73	leucostoma	0	Modern	Mexico
Leu-Mex	Leu-Mex-18	324	2.59	-1.49	leucostoma	0	Modern	Mexico
Leu-Mex	Leu-Mex-19	340	2.54	-1.83	leucostoma	0	Modern	Mexico
Leu-Mex	Leu-Mex-20	351	3.03	-1.85	leucostoma	0	Modern	Mexico
Leu-Mex	Leu-Mex-21	365	3	-1.79	leucostoma	0	Modern	Mexico
Leu-Mex	Leu-Mex-22	375	3.1	-1.48	leucostoma	0	Modern	Mexico
Leu-Mex	Leu-Mex-23	386	2.97	-1.54	leucostoma	0	Modern	Mexico
Leu-Mex	Leu-Mex-24	396	3.02	-1.51	leucostoma	0	Modern	Mexico
Leu-Mex	Leu-Mex-25	406	3.07	-1.64	leucostoma	0	Modern	Mexico
